# Supplementary material for: The new Lyon ARTbrace versus the historical Lyon brace: a prospective case series of 148 consecutive scoliosis with short time results after 1 year compared with a historical retrospective case series of 100 consecutive scoliosis; SOSORT award 2015 winner
Source: Springer Nature journal article supplement (doi:10.1186/s13013-015-0047-6), 2015-08-18

GET

```
FILE='D:\Bibliothèques\Documents\ARTbrace matched pair control.sav'.  
DATASET NAME Ensemble_de_données1 WINDOW=FRONT.  
EXAMINE VARIABLES=VAR00005 VAR00008 VAR00009 VAR00010 VAR00013 VAR00014 VA  
R00017 VAR00018 BY VAR00021  
/PLOT BOXPLOT STEMLEAF NPLOT  
/COMPARE GROUPS  
/STATISTICS DESCRIPTIVES  
/CINTERVAL 95  
/MISSING LISTWISE  
/NOTOTAL.
```

## Explore

[Ensemble\_de\_données1] D:\Bibliothèques\Documents\ARTbrace matched pair control.sav

## Categorie

Case Processing Summary

| Categorie  | Cases |             |              |               |       |         |
|------------|-------|-------------|--------------|---------------|-------|---------|
|            | Valid |             | Missing      |               | Total |         |
|            | N     | Percent     | N            | Percent       | N     | Percent |
| T init     | 1,00  | 36<br>36,4% | 63<br>63,6%  | 99<br>100,0%  | 99    | 100,0%  |
|            | 2,00  | 46<br>16,0% | 242<br>84,0% | 288<br>100,0% | 288   | 100,0%  |
| L init     | 1,00  | 36<br>36,4% | 63<br>63,6%  | 99<br>100,0%  | 99    | 100,0%  |
|            | 2,00  | 46<br>16,0% | 242<br>84,0% | 288<br>100,0% | 288   | 100,0%  |
| T in-brace | 1,00  | 36<br>36,4% | 63<br>63,6%  | 99<br>100,0%  | 99    | 100,0%  |
|            | 2,00  | 46<br>16,0% | 242<br>84,0% | 288<br>100,0% | 288   | 100,0%  |
| Lin-brace  | 1,00  | 36<br>36,4% | 63<br>63,6%  | 99<br>100,0%  | 99    | 100,0%  |
|            | 2,00  | 46<br>16,0% | 242<br>84,0% | 288<br>100,0% | 288   | 100,0%  |
| T 6 months | 1,00  | 36<br>36,4% | 63<br>63,6%  | 99<br>100,0%  | 99    | 100,0%  |
|            | 2,00  | 46<br>16,0% | 242<br>84,0% | 288<br>100,0% | 288   | 100,0%  |
| L 6 months | 1,00  | 36<br>36,4% | 63<br>63,6%  | 99<br>100,0%  | 99    | 100,0%  |
|            | 2,00  | 46<br>16,0% | 242<br>84,0% | 288<br>100,0% | 288   | 100,0%  |
| T 1 year   | 1,00  | 36<br>36,4% | 63<br>63,6%  | 99<br>100,0%  | 99    | 100,0%  |
|            | 2,00  | 46<br>16,0% | 242<br>84,0% | 288<br>100,0% | 288   | 100,0%  |
| L 1 year   | 1,00  | 36<br>36,4% | 63<br>63,6%  | 99<br>100,0%  | 99    | 100,0%  |
|            | 2,00  | 46<br>16,0% | 242<br>84,0% | 288<br>100,0% | 288   | 100,0%  |

**Descriptives**

| Categorie           |         |                                  | Statistic   | Std. Error                       |             |         |
|---------------------|---------|----------------------------------|-------------|----------------------------------|-------------|---------|
| T init              | 1,00    | Mean                             | 31,1111     | 1,53260                          |             |         |
|                     |         | 95% Confidence Interval for Mean | Lower Bound | 27,9998                          |             |         |
|                     |         |                                  | Upper Bound | 34,2224                          |             |         |
|                     |         | 5% Trimmed Mean                  | 30,5556     |                                  |             |         |
|                     |         | Median                           | 30,0000     |                                  |             |         |
|                     |         | Variance                         | 84,559      |                                  |             |         |
|                     |         | Std. Deviation                   | 9,19558     |                                  |             |         |
|                     |         | Minimum                          | 20,00       |                                  |             |         |
|                     |         | Maximum                          | 54,00       |                                  |             |         |
|                     |         | Range                            | 34,00       |                                  |             |         |
|                     |         | Interquartile Range              | 12,50       |                                  |             |         |
|                     |         | Skewness                         | ,770        | ,393                             |             |         |
|                     |         | Kurtosis                         | -,157       | ,768                             |             |         |
|                     |         | 2,00                             | 2,00        | Mean                             | 28,9348     | 1,09562 |
|                     |         |                                  |             | 95% Confidence Interval for Mean | Lower Bound | 26,7281 |
| Upper Bound         | 31,1415 |                                  |             |                                  |             |         |
| 5% Trimmed Mean     | 28,4155 |                                  |             |                                  |             |         |
| Median              | 27,0000 |                                  |             |                                  |             |         |
| Variance            | 55,218  |                                  |             |                                  |             |         |
| Std. Deviation      | 7,43087 |                                  |             |                                  |             |         |
| Minimum             | 19,00   |                                  |             |                                  |             |         |
| Maximum             | 50,00   |                                  |             |                                  |             |         |
| Range               | 31,00   |                                  |             |                                  |             |         |
| Interquartile Range | 10,25   |                                  |             |                                  |             |         |
| Skewness            | ,951    |                                  |             | ,350                             |             |         |
| Kurtosis            | ,545    |                                  |             | ,688                             |             |         |
| L init              | 1,00    |                                  |             | Mean                             | 26,1389     | 1,17186 |
|                     |         |                                  |             | 95% Confidence Interval for Mean | Lower Bound | 23,7599 |
|                     |         | Upper Bound                      | 28,5179     |                                  |             |         |
|                     |         | 5% Trimmed Mean                  | 25,7531     |                                  |             |         |
|                     |         | Median                           | 24,5000     |                                  |             |         |
|                     |         | Variance                         | 49,437      |                                  |             |         |
|                     |         | Std. Deviation                   | 7,03117     |                                  |             |         |
|                     |         | Minimum                          | 16,00       |                                  |             |         |
|                     |         | Maximum                          | 45,00       |                                  |             |         |
|                     |         | Range                            | 29,00       |                                  |             |         |
|                     |         | Interquartile Range              | 9,00        |                                  |             |         |
|                     |         | Skewness                         | 1,021       | ,393                             |             |         |
|                     |         | Kurtosis                         | ,468        | ,768                             |             |         |
|                     |         | 2,00                             | 2,00        | Mean                             | 29,1087     | 1,22740 |
|                     |         |                                  |             | 95% Confidence Interval for Mean | Lower Bound | 26,6366 |
| Upper Bound         | 31,5808 |                                  |             |                                  |             |         |
| 5% Trimmed Mean     | 28,6256 |                                  |             |                                  |             |         |

**Descriptives**

| Categorie                        |                                  | Statistic           | Std. Error  |         |         |
|----------------------------------|----------------------------------|---------------------|-------------|---------|---------|
| T in-brace                       | 1,00                             | Median              | 28,0000     |         |         |
|                                  |                                  | Variance            | 69,299      |         |         |
|                                  |                                  | Std. Deviation      | 8,32460     |         |         |
|                                  |                                  | Minimum             | 16,00       |         |         |
|                                  |                                  | Maximum             | 53,00       |         |         |
|                                  |                                  | Range               | 37,00       |         |         |
|                                  |                                  | Interquartile Range | 11,00       |         |         |
|                                  |                                  | Skewness            | ,857        | ,350    |         |
|                                  |                                  | Kurtosis            | ,700        | ,688    |         |
|                                  |                                  | Mean                | 18,4444     | 1,54172 |         |
|                                  | 95% Confidence Interval for Mean | Lower Bound         | 15,3146     |         |         |
|                                  |                                  | Upper Bound         | 21,5743     |         |         |
|                                  | 5% Trimmed Mean                  | 17,8457             |             |         |         |
|                                  | Median                           | 18,0000             |             |         |         |
|                                  | Variance                         | 85,568              |             |         |         |
|                                  | Std. Deviation                   | 9,25031             |             |         |         |
|                                  | Minimum                          | 4,00                |             |         |         |
|                                  | Maximum                          | 49,00               |             |         |         |
|                                  | Range                            | 45,00               |             |         |         |
|                                  | Interquartile Range              | 8,50                |             |         |         |
| Skewness                         | 1,206                            | ,393                |             |         |         |
| Kurtosis                         | 2,280                            | ,768                |             |         |         |
| 2,00                             | Mean                             | 12,3043             | 1,18520     |         |         |
|                                  | 95% Confidence Interval for Mean | Lower Bound         | 9,9172      |         |         |
|                                  |                                  | Upper Bound         | 14,6915     |         |         |
|                                  | 5% Trimmed Mean                  | 11,7319             |             |         |         |
|                                  | Median                           | 11,0000             |             |         |         |
|                                  | Variance                         | 64,616              |             |         |         |
|                                  | Std. Deviation                   | 8,03843             |             |         |         |
|                                  | Minimum                          | ,00                 |             |         |         |
|                                  | Maximum                          | 34,00               |             |         |         |
|                                  | Range                            | 34,00               |             |         |         |
|                                  | Interquartile Range              | 12,00               |             |         |         |
|                                  | Skewness                         | ,963                | ,350        |         |         |
|                                  | Kurtosis                         | ,731                | ,688        |         |         |
|                                  | Lin-brace                        | 1,00                | Mean        | 14,0556 | 1,18853 |
| 95% Confidence Interval for Mean |                                  |                     | Lower Bound | 11,6427 |         |
|                                  |                                  |                     | Upper Bound | 16,4684 |         |
| 5% Trimmed Mean                  |                                  |                     | 13,5741     |         |         |
| Median                           |                                  |                     | 13,5000     |         |         |
| Variance                         |                                  |                     | 50,854      |         |         |
| Std. Deviation                   |                                  |                     | 7,13120     |         |         |
| Minimum                          |                                  |                     | 4,00        |         |         |

**Descriptives**

| Categorie           |                                  | Statistic                        | Std. Error  |         |
|---------------------|----------------------------------|----------------------------------|-------------|---------|
| 2,00                | Maximum                          | 35,00                            |             |         |
|                     | Range                            | 31,00                            |             |         |
|                     | Interquartile Range              | 10,50                            |             |         |
|                     | Skewness                         | ,894                             | ,393        |         |
|                     | Kurtosis                         | ,934                             | ,768        |         |
|                     | Mean                             | 10,8478                          | 1,22098     |         |
|                     | 95% Confidence Interval for Mean | Lower Bound                      | 8,3886      |         |
|                     |                                  | Upper Bound                      | 13,3070     |         |
|                     | 5% Trimmed Mean                  | 10,4952                          |             |         |
|                     | Median                           | 9,0000                           |             |         |
|                     | Variance                         | 68,576                           |             |         |
|                     | Std. Deviation                   | 8,28108                          |             |         |
|                     | Minimum                          | ,00                              |             |         |
|                     | Maximum                          | 30,00                            |             |         |
|                     | Range                            | 30,00                            |             |         |
| Interquartile Range | 12,25                            |                                  |             |         |
| Skewness            | ,567                             | ,350                             |             |         |
| Kurtosis            | -,699                            | ,688                             |             |         |
| T 6 months 1,00     | Mean                             | 25,4444                          | 1,84711     |         |
|                     | 95% Confidence Interval for Mean | Lower Bound                      | 21,6946     |         |
|                     |                                  | Upper Bound                      | 29,1943     |         |
|                     | 5% Trimmed Mean                  | 24,7346                          |             |         |
|                     | Median                           | 24,0000                          |             |         |
|                     | Variance                         | 122,825                          |             |         |
|                     | Std. Deviation                   | 11,08266                         |             |         |
|                     | Minimum                          | 10,00                            |             |         |
|                     | Maximum                          | 55,00                            |             |         |
|                     | Range                            | 45,00                            |             |         |
|                     | Interquartile Range              | 11,50                            |             |         |
|                     | Skewness                         | 1,152                            | ,393        |         |
|                     | Kurtosis                         | 1,290                            | ,768        |         |
|                     | 2,00                             | Mean                             | 21,2826     | 1,58698 |
|                     |                                  | 95% Confidence Interval for Mean | Lower Bound | 18,0863 |
| Upper Bound         |                                  |                                  | 24,4790     |         |
| 5% Trimmed Mean     |                                  | 20,7319                          |             |         |
| Median              |                                  | 19,0000                          |             |         |
| Variance            |                                  | 115,852                          |             |         |
| Std. Deviation      |                                  | 10,76344                         |             |         |
| Minimum             |                                  | 2,00                             |             |         |
| Maximum             |                                  | 52,00                            |             |         |
| Range               |                                  | 50,00                            |             |         |
| Interquartile Range |                                  | 14,25                            |             |         |
| Skewness            |                                  | ,911                             | ,350        |         |

**Descriptives**

| Categorie                        |                            | Statistic                        | Std. Error                 |                                  |                            |                    |  |
|----------------------------------|----------------------------|----------------------------------|----------------------------|----------------------------------|----------------------------|--------------------|--|
| L 6 months                       | 1,00                       | Kurtosis                         | ,679                       | ,688                             |                            |                    |  |
|                                  |                            | Mean                             | 20,2222                    | 1,38307                          |                            |                    |  |
|                                  |                            | 95% Confidence Interval for Mean | Lower Bound<br>Upper Bound | 17,4144<br>23,0300               |                            |                    |  |
|                                  |                            | 5% Trimmed Mean                  | 19,5926                    |                                  |                            |                    |  |
|                                  |                            | Median                           | 19,0000                    |                                  |                            |                    |  |
|                                  |                            | Variance                         | 68,863                     |                                  |                            |                    |  |
|                                  |                            | Std. Deviation                   | 8,29840                    |                                  |                            |                    |  |
|                                  |                            | Minimum                          | 9,00                       |                                  |                            |                    |  |
|                                  |                            | Maximum                          | 45,00                      |                                  |                            |                    |  |
|                                  |                            | Range                            | 36,00                      |                                  |                            |                    |  |
|                                  |                            | Interquartile Range              | 9,50                       |                                  |                            |                    |  |
|                                  |                            | Skewness                         | 1,079                      | ,393                             |                            |                    |  |
|                                  |                            | Kurtosis                         | 1,466                      | ,768                             |                            |                    |  |
|                                  |                            |                                  | 2,00                       | Mean                             | 19,3913                    | 1,32915            |  |
| 95% Confidence Interval for Mean | Lower Bound<br>Upper Bound |                                  |                            | 16,7143<br>22,0684               |                            |                    |  |
| 5% Trimmed Mean                  | 19,0942                    |                                  |                            |                                  |                            |                    |  |
| Median                           | 18,0000                    |                                  |                            |                                  |                            |                    |  |
| Variance                         | 81,266                     |                                  |                            |                                  |                            |                    |  |
| Std. Deviation                   | 9,01475                    |                                  |                            |                                  |                            |                    |  |
| Minimum                          | 3,00                       |                                  |                            |                                  |                            |                    |  |
| Maximum                          | 40,00                      |                                  |                            |                                  |                            |                    |  |
| Range                            | 37,00                      |                                  |                            |                                  |                            |                    |  |
| Interquartile Range              | 12,50                      |                                  |                            |                                  |                            |                    |  |
| Skewness                         | ,605                       |                                  |                            | ,350                             |                            |                    |  |
| Kurtosis                         | -,354                      |                                  |                            | ,688                             |                            |                    |  |
| T 1 year                         | 1,00                       |                                  |                            | Mean                             | 28,2222                    | 1,88735            |  |
|                                  |                            |                                  |                            | 95% Confidence Interval for Mean | Lower Bound<br>Upper Bound | 24,3907<br>32,0537 |  |
|                                  |                            | 5% Trimmed Mean                  | 27,5247                    |                                  |                            |                    |  |
|                                  |                            | Median                           | 27,0000                    |                                  |                            |                    |  |
|                                  |                            | Variance                         | 128,235                    |                                  |                            |                    |  |
|                                  |                            | Std. Deviation                   | 11,32409                   |                                  |                            |                    |  |
|                                  |                            | Minimum                          | 14,00                      |                                  |                            |                    |  |
|                                  |                            | Maximum                          | 55,00                      |                                  |                            |                    |  |
|                                  |                            | Range                            | 41,00                      |                                  |                            |                    |  |
|                                  |                            | Interquartile Range              | 13,25                      |                                  |                            |                    |  |
|                                  |                            | Skewness                         | ,979                       | ,393                             |                            |                    |  |
|                                  |                            | Kurtosis                         | ,215                       | ,768                             |                            |                    |  |
|                                  |                            |                                  | 2,00                       | Mean                             | 22,1957                    | 1,41647            |  |
|                                  |                            |                                  |                            | 95% Confidence Interval for Mean | Lower Bound<br>Upper Bound | 19,3427<br>25,0486 |  |

**Descriptives**

| Categorie |                                  | Statistic                        | Std. Error                 |                    |  |
|-----------|----------------------------------|----------------------------------|----------------------------|--------------------|--|
| L 1 year  | 1,00                             | 5% Trimmed Mean                  | 22,0097                    |                    |  |
|           |                                  | Median                           | 20,0000                    |                    |  |
|           |                                  | Variance                         | 92,294                     |                    |  |
|           |                                  | Std. Deviation                   | 9,60699                    |                    |  |
|           |                                  | Minimum                          | 5,00                       |                    |  |
|           |                                  | Maximum                          | 43,00                      |                    |  |
|           |                                  | Range                            | 38,00                      |                    |  |
|           |                                  | Interquartile Range              | 13,75                      |                    |  |
|           |                                  | Skewness                         | ,346                       | ,350               |  |
|           |                                  | Kurtosis                         | -,491                      | ,688               |  |
|           | Mean                             | 21,9167                          | 1,38379                    |                    |  |
|           | 95% Confidence Interval for Mean | Lower Bound<br>Upper Bound       | 19,1074<br>24,7259         |                    |  |
|           | 5% Trimmed Mean                  | 21,1543                          |                            |                    |  |
|           | Median                           | 20,5000                          |                            |                    |  |
|           | Variance                         | 68,936                           |                            |                    |  |
|           | Std. Deviation                   | 8,30275                          |                            |                    |  |
|           | Minimum                          | 10,00                            |                            |                    |  |
|           | Maximum                          | 48,00                            |                            |                    |  |
|           | Range                            | 38,00                            |                            |                    |  |
|           | Interquartile Range              | 10,50                            |                            |                    |  |
|           | Skewness                         | 1,411                            | ,393                       |                    |  |
|           | Kurtosis                         | 2,674                            | ,768                       |                    |  |
|           | 2,00                             | Mean                             | 20,2174                    | 1,35487            |  |
|           |                                  | 95% Confidence Interval for Mean | Lower Bound<br>Upper Bound | 17,4885<br>22,9462 |  |
|           |                                  | 5% Trimmed Mean                  | 20,0266                    |                    |  |
|           | Median                           | 18,0000                          |                            |                    |  |
|           | Variance                         | 84,441                           |                            |                    |  |
|           | Std. Deviation                   | 9,18916                          |                            |                    |  |
|           | Minimum                          | 2,00                             |                            |                    |  |
|           | Maximum                          | 40,00                            |                            |                    |  |
|           | Range                            | 38,00                            |                            |                    |  |
|           | Interquartile Range              | 13,25                            |                            |                    |  |
|           | Skewness                         | ,443                             | ,350                       |                    |  |
|           | Kurtosis                         | -,472                            | ,688                       |                    |  |

### Tests of Normality

| Categorie  | Kolmogorov-Smirnov <sup>a</sup> |    |       | Shapiro-Wilk |    |      |
|------------|---------------------------------|----|-------|--------------|----|------|
|            | Statistic                       | df | Sig.  | Statistic    | df | Sig. |
| T init     | 1,00                            | 36 | ,143  | ,923         | 36 | ,016 |
|            | 2,00                            | 46 | ,005  | ,921         | 46 | ,004 |
| L init     | 1,00                            | 36 | ,007  | ,907         | 36 | ,006 |
|            | 2,00                            | 46 | ,045  | ,941         | 46 | ,022 |
| T in-brace | 1,00                            | 36 | ,004  | ,920         | 36 | ,013 |
|            | 2,00                            | 46 | ,029  | ,918         | 46 | ,003 |
| Lin-brace  | 1,00                            | 36 | ,200* | ,938         | 36 | ,044 |
|            | 2,00                            | 46 | ,180  | ,934         | 46 | ,012 |
| T 6 months | 1,00                            | 36 | ,122  | ,902         | 36 | ,004 |
|            | 2,00                            | 46 | ,004  | ,936         | 46 | ,014 |
| L 6 months | 1,00                            | 36 | ,200* | ,926         | 36 | ,019 |
|            | 2,00                            | 46 | ,013  | ,950         | 46 | ,046 |
| T 1 year   | 1,00                            | 36 | ,032  | ,900         | 36 | ,003 |
|            | 2,00                            | 46 | ,027  | ,965         | 46 | ,183 |
| L 1 year   | 1,00                            | 36 | ,185  | ,889         | 36 | ,002 |
|            | 2,00                            | 46 | ,025  | ,958         | 46 | ,095 |

\*. This is a lower bound of the true significance.

a. Lilliefors Significance Correction

## T init

### Stem-and-Leaf Plots

T init Stem-and-Leaf Plot for  
VAR00021= 1,00

```

Frequency      Stem & Leaf

 10,00         2 . 0000112334
   6,00         2 . 555688
 10,00         3 . 0000222234
   2,00         3 . 56
   4,00         4 . 0134
   2,00         4 . 56
   1,00         5 . 0
   1,00 Extremes      (>=54)

```

```

Stem width:      10,00
Each leaf:       1 case(s)

```

T init Stem-and-Leaf Plot for  
VAR00021= 2,00

| Frequency | Stem &   | Leaf      |
|-----------|----------|-----------|
| 1,00      | 1 .      | 9         |
| 6,00      | 2 .      | 000000    |
| 2,00      | 2 .      | 22        |
| 9,00      | 2 .      | 444455555 |
| 6,00      | 2 .      | 667777    |
| 5,00      | 2 .      | 88889     |
| 3,00      | 3 .      | 000       |
| 2,00      | 3 .      | 22        |
| 4,00      | 3 .      | 4555      |
| 1,00      | 3 .      | 7         |
| 3,00      | 3 .      | 889       |
| ,00       | 4 .      |           |
| 2,00      | 4 .      | 22        |
| ,00       | 4 .      |           |
| 1,00      | 4 .      | 7         |
| 1,00      | Extremes | (>=50)    |

Stem width: 10,00  
Each leaf: 1 case(s)

## Normal Q-Q Plots



### Normal Q-Q Plot of T init

for VAR00021= 1,00

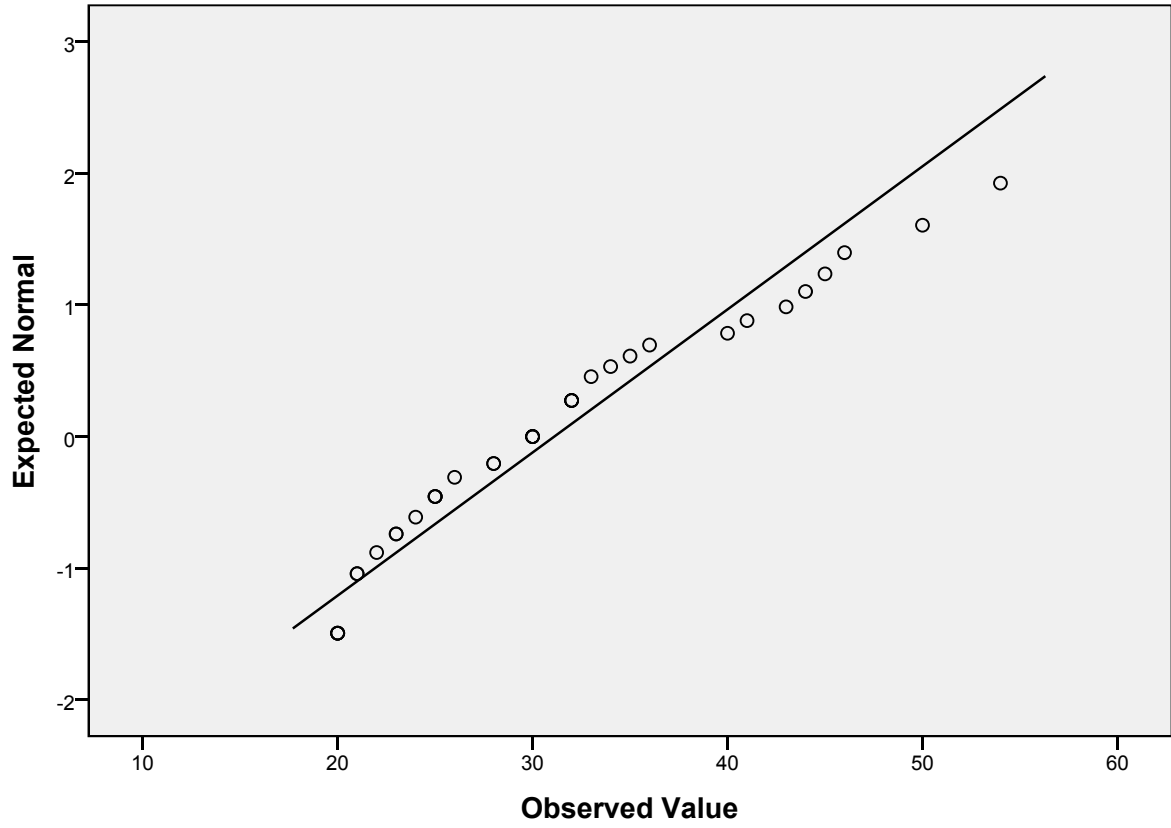

### Normal Q-Q Plot of T init

for VAR00021= 2,00

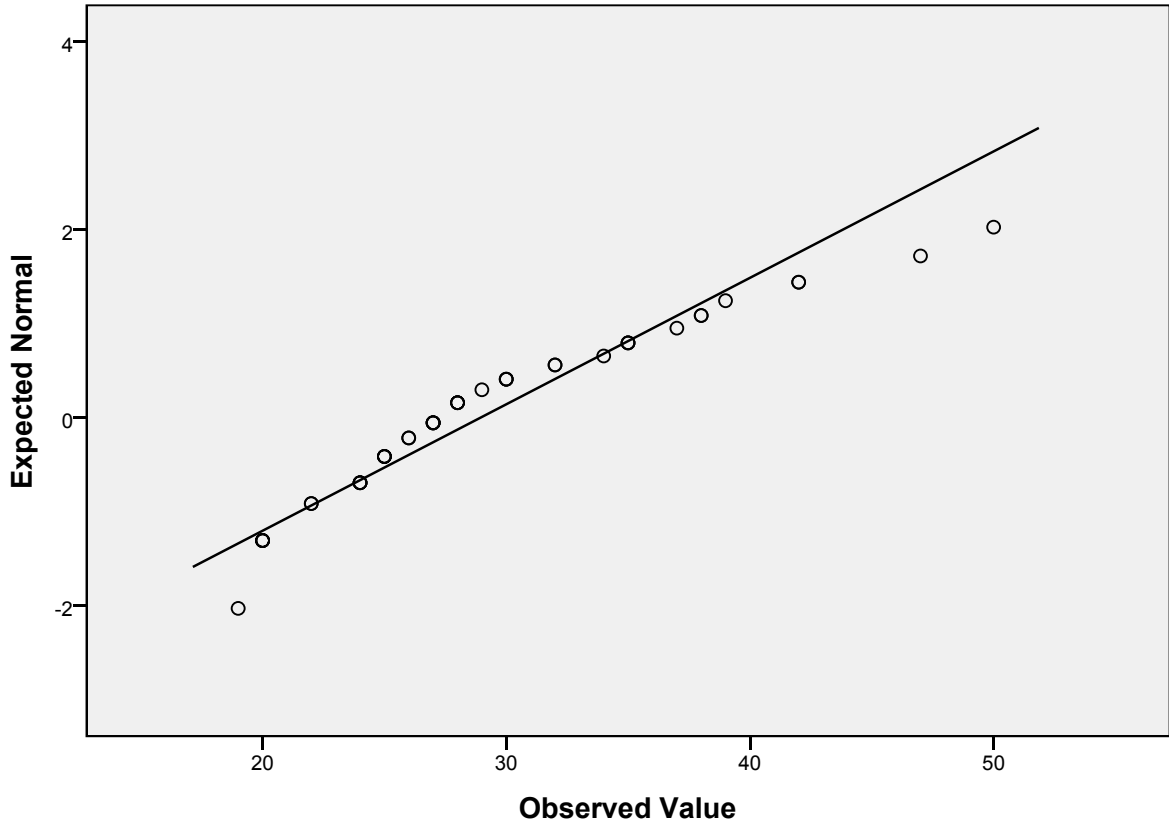

### Detrended Normal Q-Q Plots

### Detrended Normal Q-Q Plot of T init

for VAR00021= 1,00

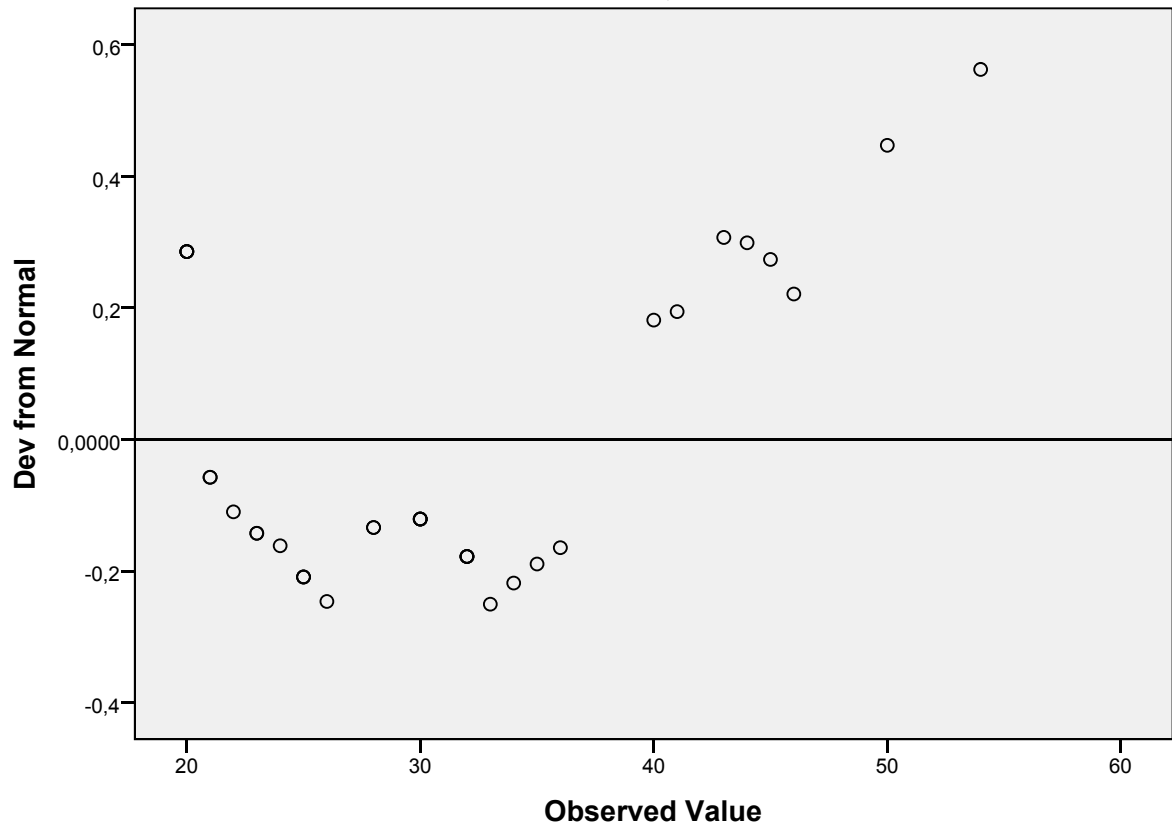

### Detrended Normal Q-Q Plot of T init

for VAR00021= 2,00

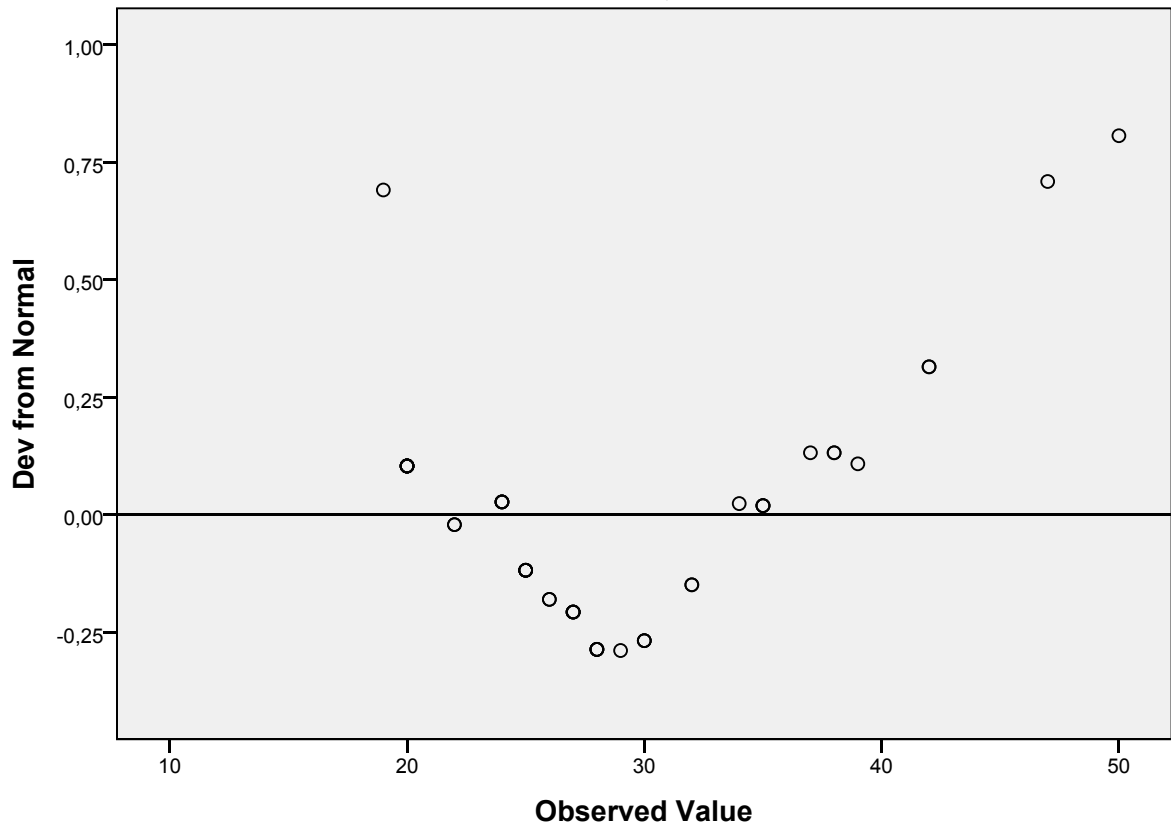

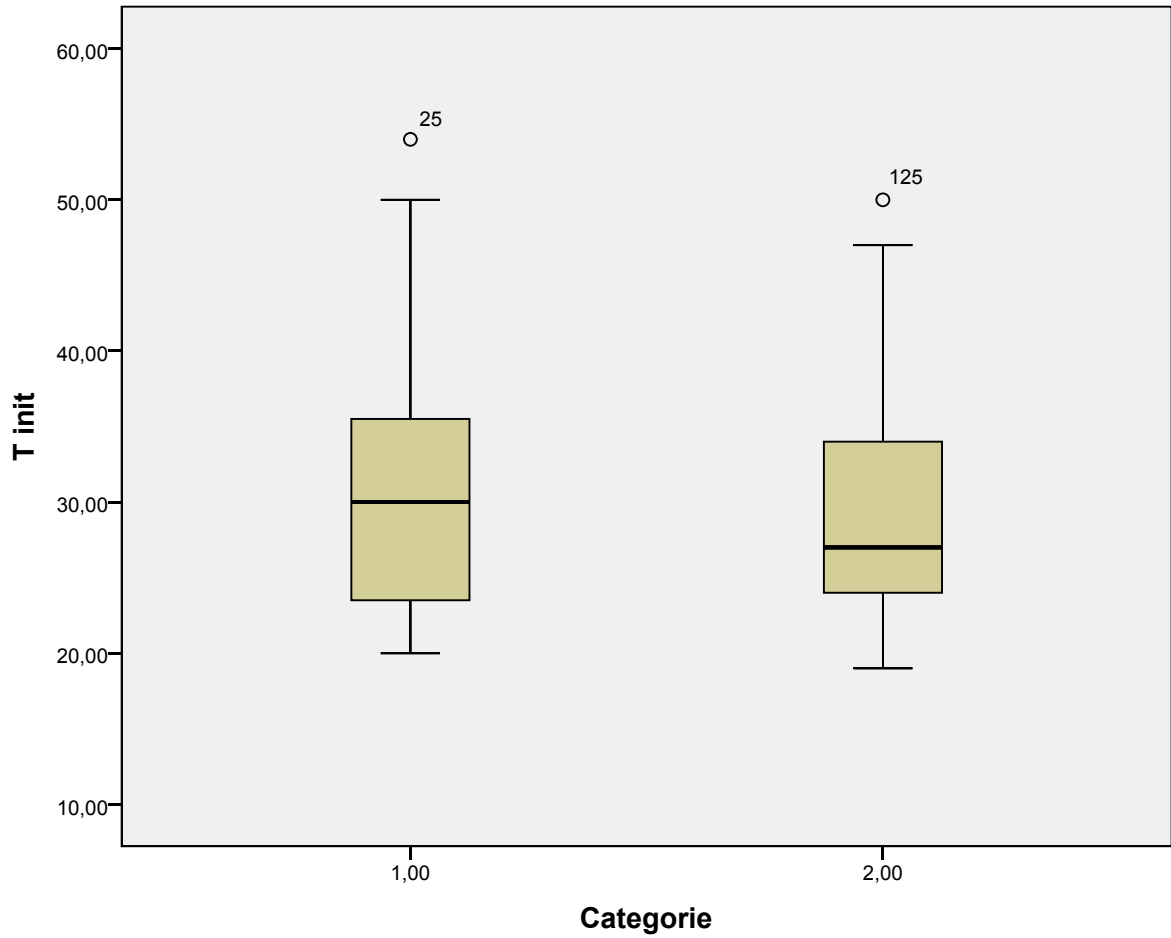

## L init

### Stem-and-Leaf Plots

L init Stem-and-Leaf Plot for  
VAR00021= 1,00

| Frequency | Stem &   | Leaf            |
|-----------|----------|-----------------|
| 3,00      | 1 .      | 678             |
| 15,00     | 2 .      | 000011122233334 |
| 8,00      | 2 .      | 55556679        |
| 6,00      | 3 .      | 003334          |
| 1,00      | 3 .      | 9               |
| 2,00      | 4 .      | 00              |
| 1,00      | Extremes | (>=45)          |

Stem width: 10,00  
Each leaf: 1 case(s)

L init Stem-and-Leaf Plot for  
VAR00021= 2,00

| Frequency | Stem &   | Leaf   |
|-----------|----------|--------|
| ,00       | 1 .      |        |
| 1,00      | 1 .      | 6      |
| 4,00      | 1 .      | 8889   |
| 5,00      | 2 .      | 11111  |
| 3,00      | 2 .      | 222    |
| 3,00      | 2 .      | 555    |
| 5,00      | 2 .      | 77777  |
| 4,00      | 2 .      | 8889   |
| 6,00      | 3 .      | 000000 |
| 5,00      | 3 .      | 22233  |
| 2,00      | 3 .      | 55     |
| 2,00      | 3 .      | 67     |
| 1,00      | 3 .      | 8      |
| ,00       | 4 .      |        |
| 1,00      | 4 .      | 2      |
| 2,00      | 4 .      | 55     |
| ,00       | 4 .      |        |
| 1,00      | 4 .      | 8      |
| 1,00      | Extremes | (>=53) |

Stem width: 10,00  
Each leaf: 1 case(s)

## Normal Q-Q Plots

### Normal Q-Q Plot of L init

for VAR00021= 1,00

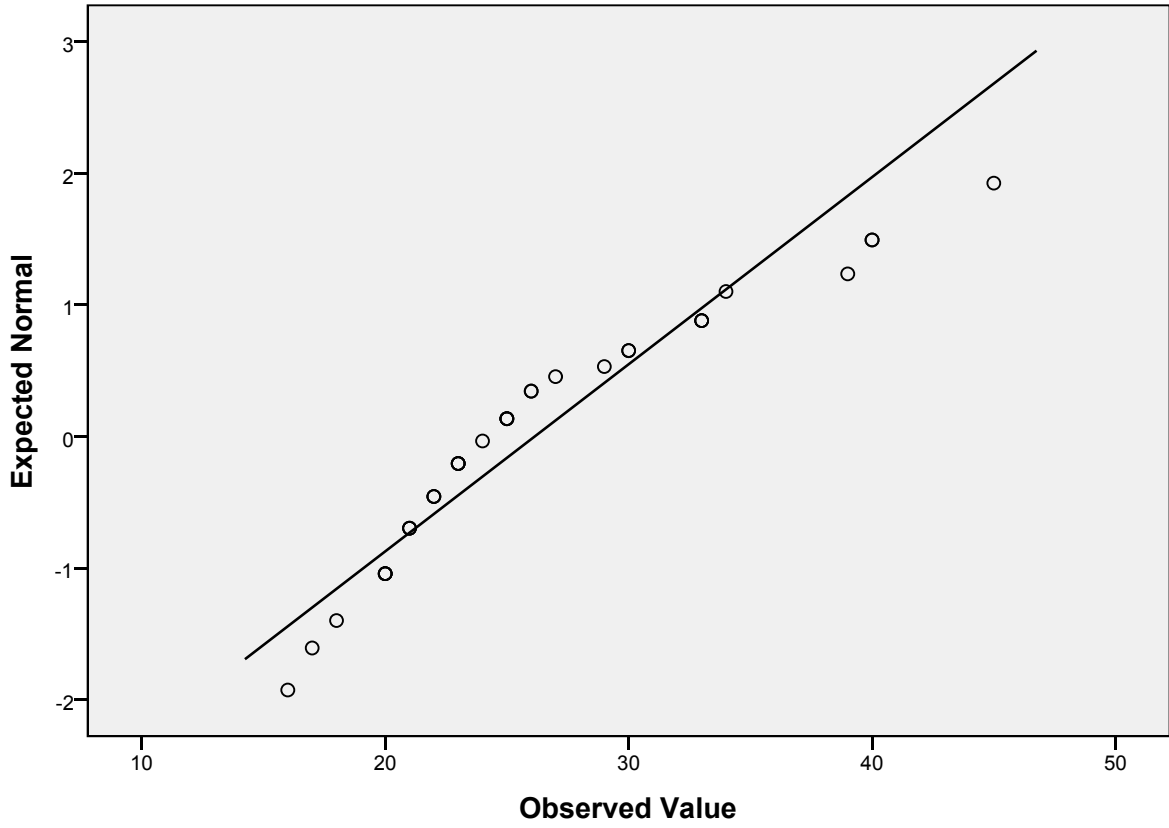

### Normal Q-Q Plot of L init

for VAR00021= 2,00

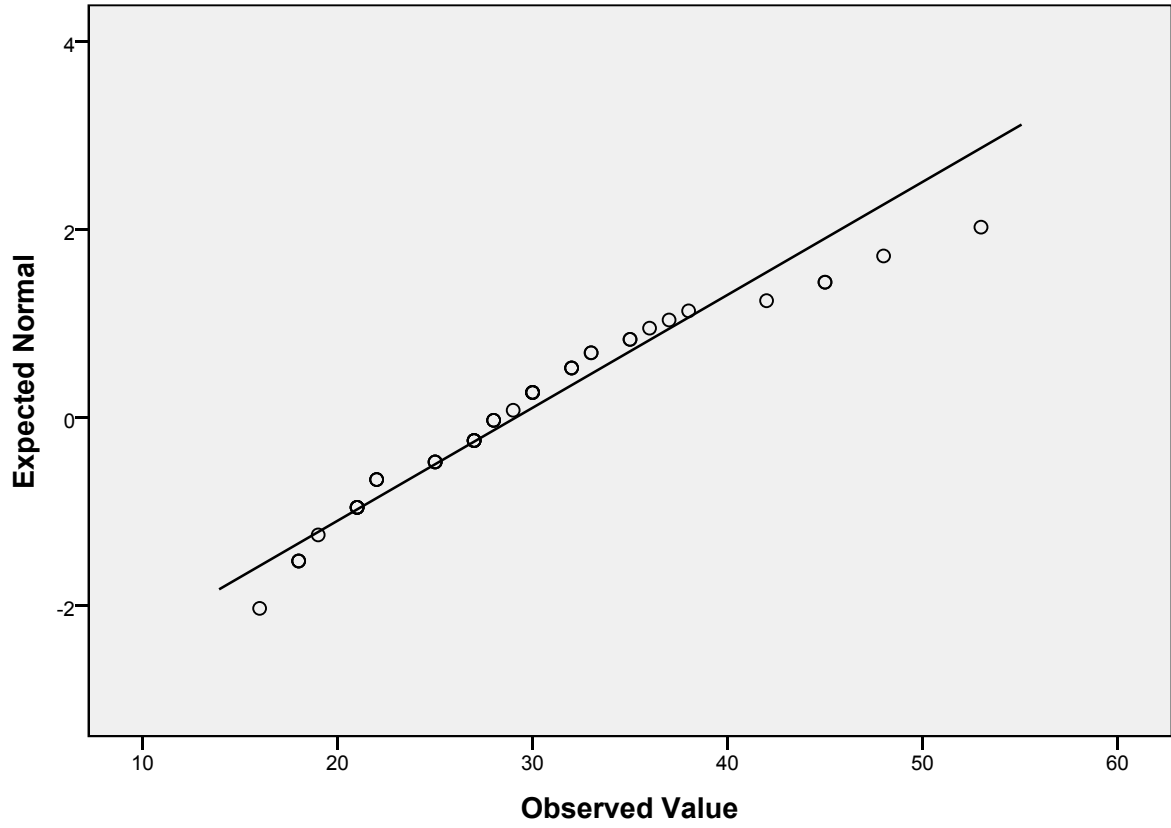

### Detrended Normal Q-Q Plots



**Detrended Normal Q-Q Plot of L init**

for VAR00021= 1,00

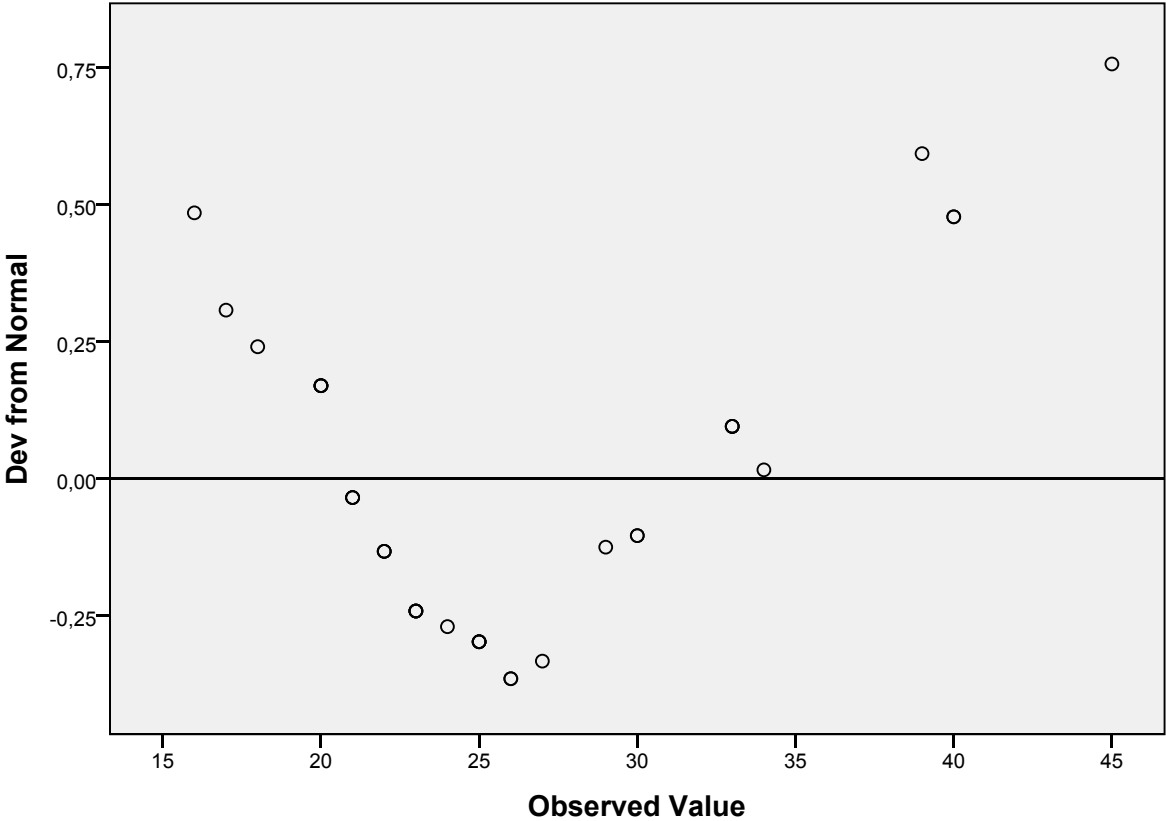

### Detrended Normal Q-Q Plot of L init

for VAR00021= 2,00

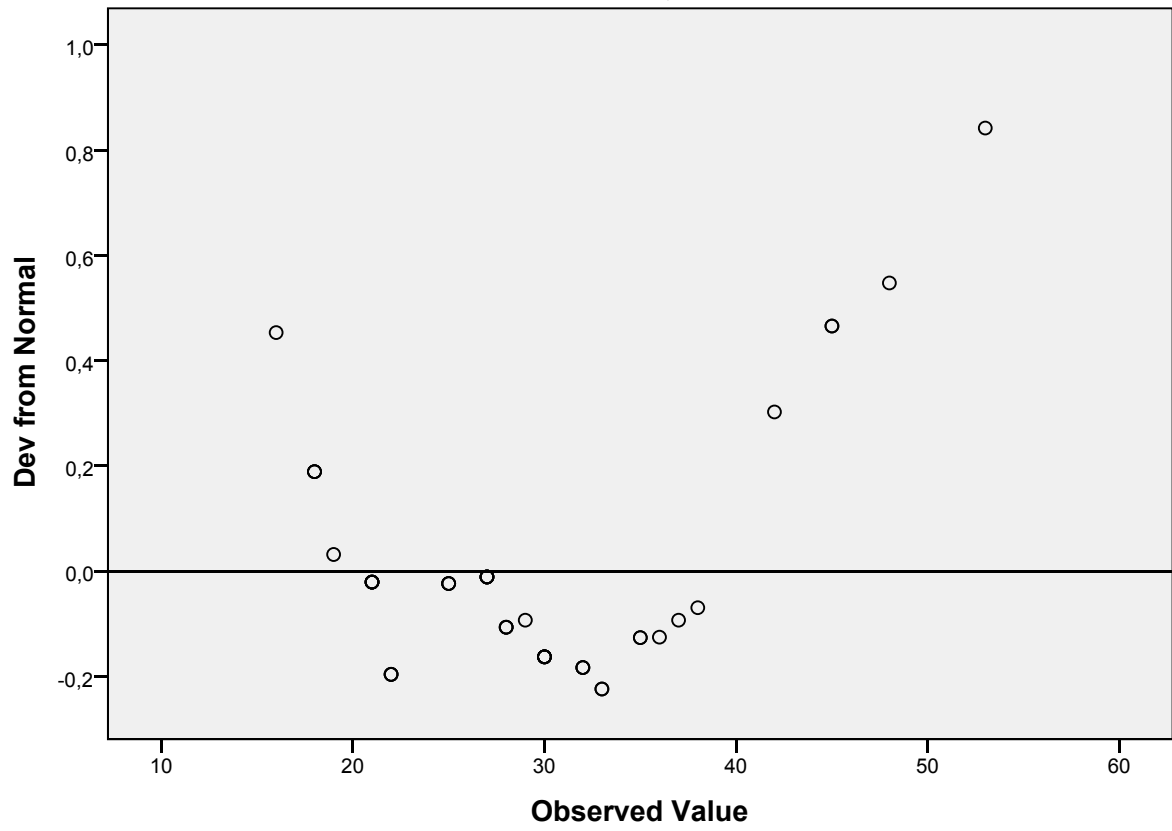

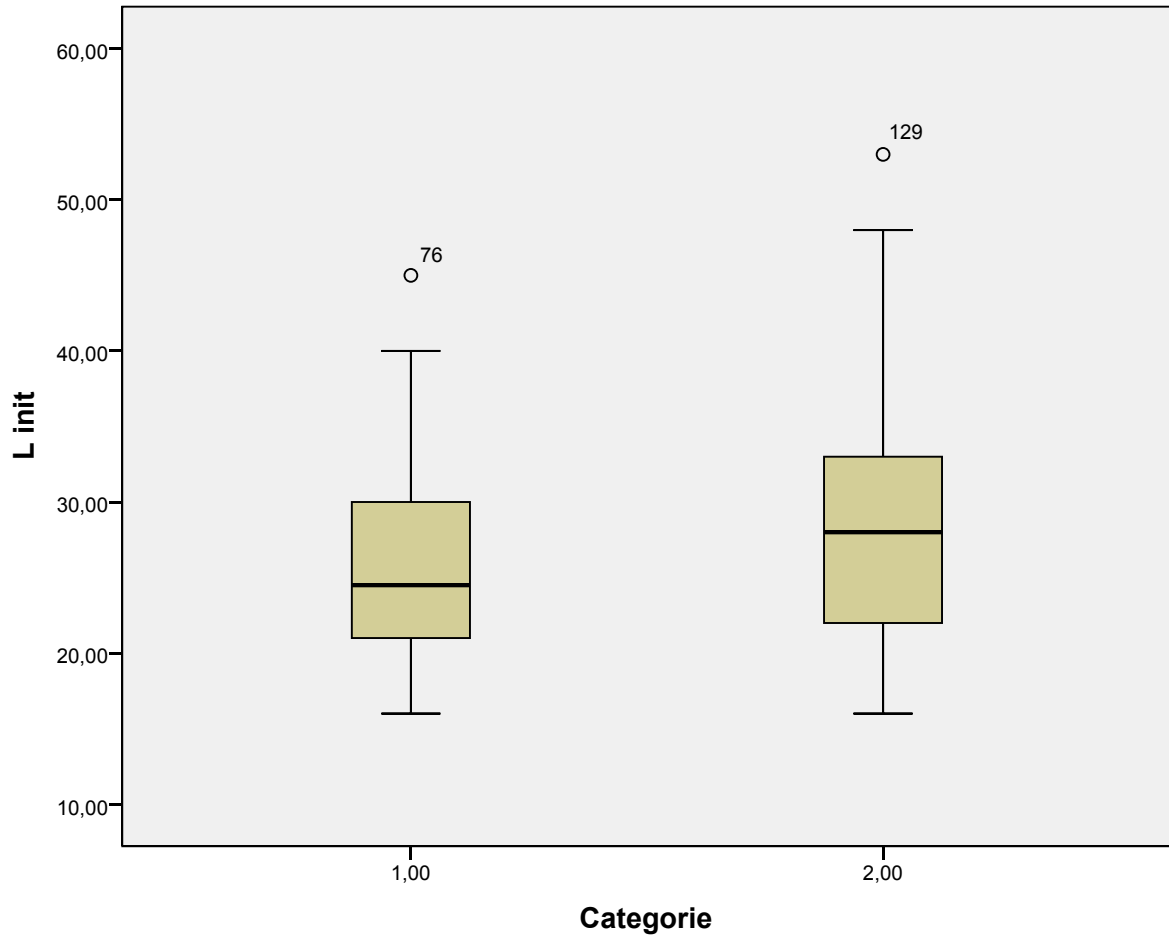

## T in-brace

### Stem-and-Leaf Plots

T in-brace Stem-and-Leaf Plot for  
VAR00021= 1,00

| Frequency | Stem &   | Leaf          |
|-----------|----------|---------------|
| 1,00      | 0 .      | 4             |
| 3,00      | 0 .      | 578           |
| 8,00      | 1 .      | 00113334      |
| 13,00     | 1 .      | 5556788888999 |
| 3,00      | 2 .      | 002           |
| 4,00      | 2 .      | 5788          |
| 1,00      | 3 .      | 1             |
| 3,00      | Extremes | (>=34)        |

Stem width: 10,00  
Each leaf: 1 case(s)

T in-brace Stem-and-Leaf Plot for  
VAR00021= 2,00

| Frequency | Stem & | Leaf      |
|-----------|--------|-----------|
| 1,00      | 0 .    | 0         |
| 3,00      | 0 .    | 333       |
| 6,00      | 0 .    | 444445    |
| 3,00      | 0 .    | 667       |
| 9,00      | 0 .    | 888888999 |
| 2,00      | 1 .    | 11        |
| 4,00      | 1 .    | 2222      |
| 3,00      | 1 .    | 444       |
| 1,00      | 1 .    | 6         |
| 9,00      | 1 .    | 888889999 |
| 1,00      | 2 .    | 1         |
| ,00       | 2 .    |           |
| ,00       | 2 .    |           |
| 1,00      | 2 .    | 7         |
| 1,00      | 2 .    | 8         |
| ,00       | 3 .    |           |
| ,00       | 3 .    |           |
| 2,00      | 3 .    | 44        |

Stem width: 10,00  
Each leaf: 1 case(s)

## Normal Q-Q Plots

### Normal Q-Q Plot of T in-brace

for VAR00021= 1,00

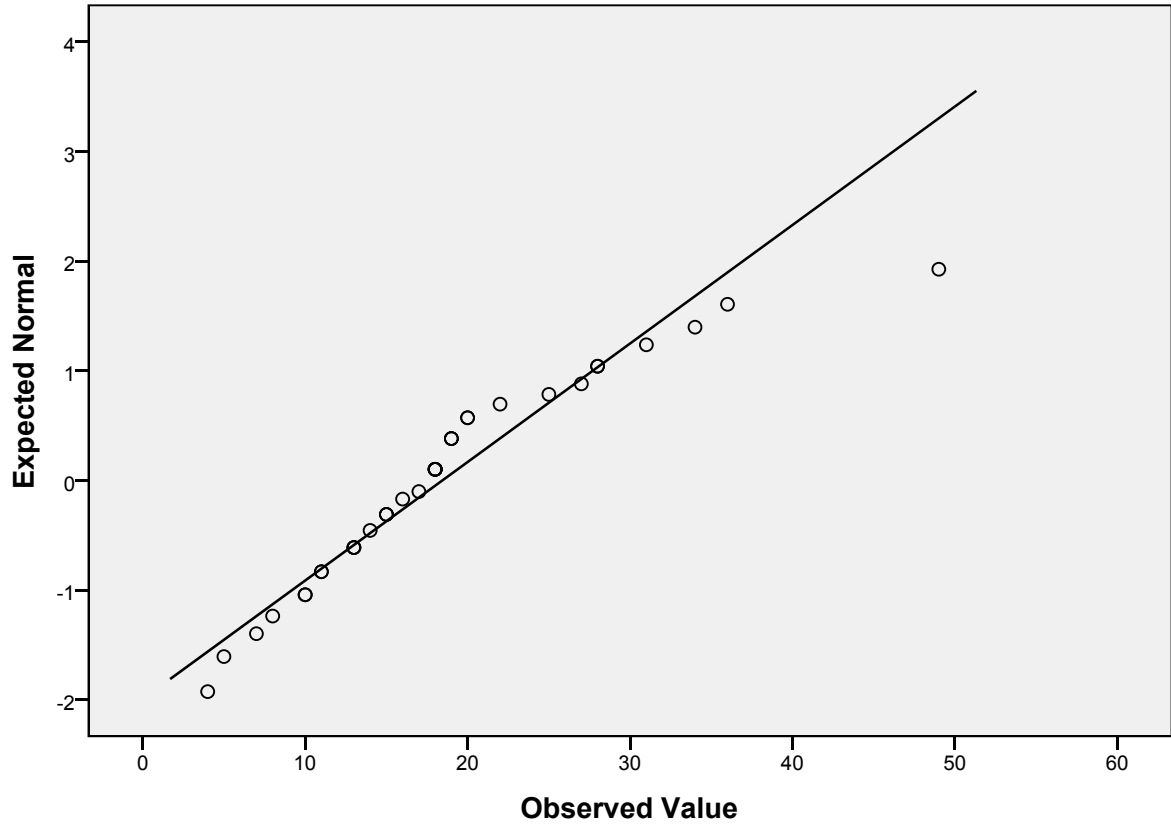

### Normal Q-Q Plot of T in-brace

for VAR00021= 2,00

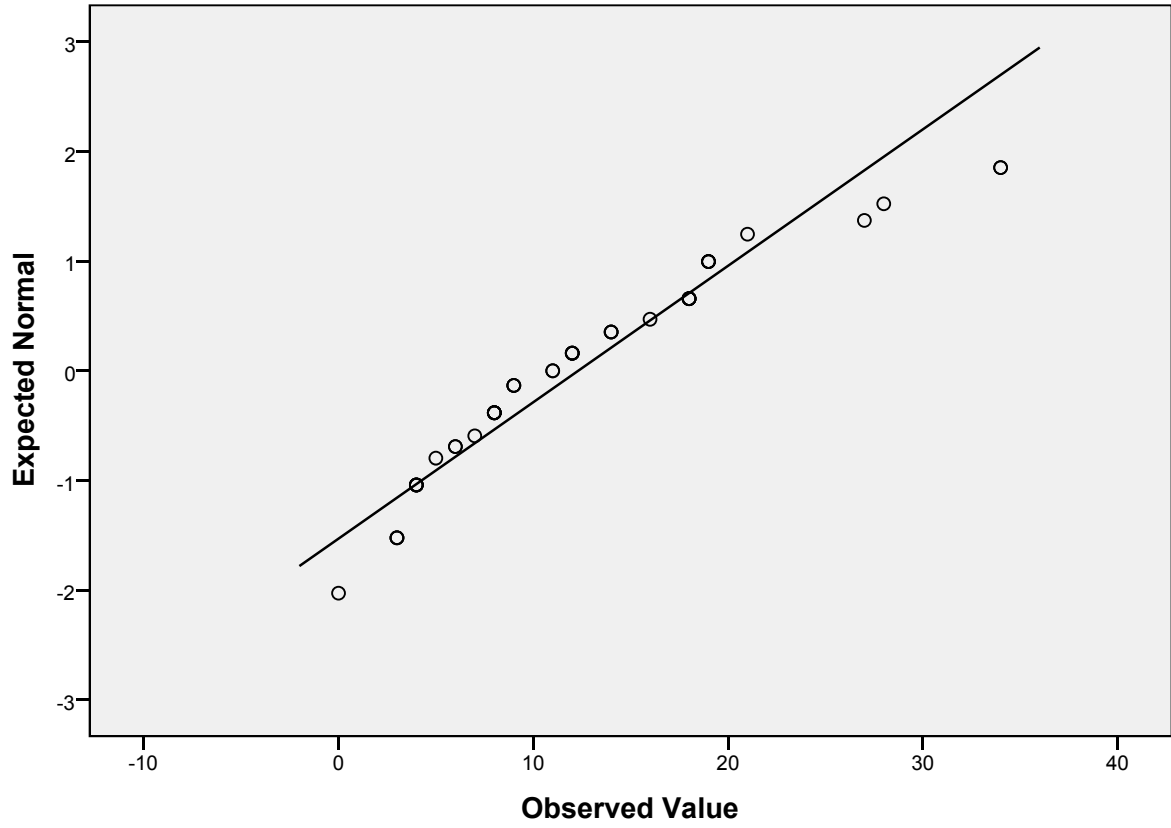

### Detrended Normal Q-Q Plots

### Detrended Normal Q-Q Plot of T in-brace

for VAR00021= 1,00

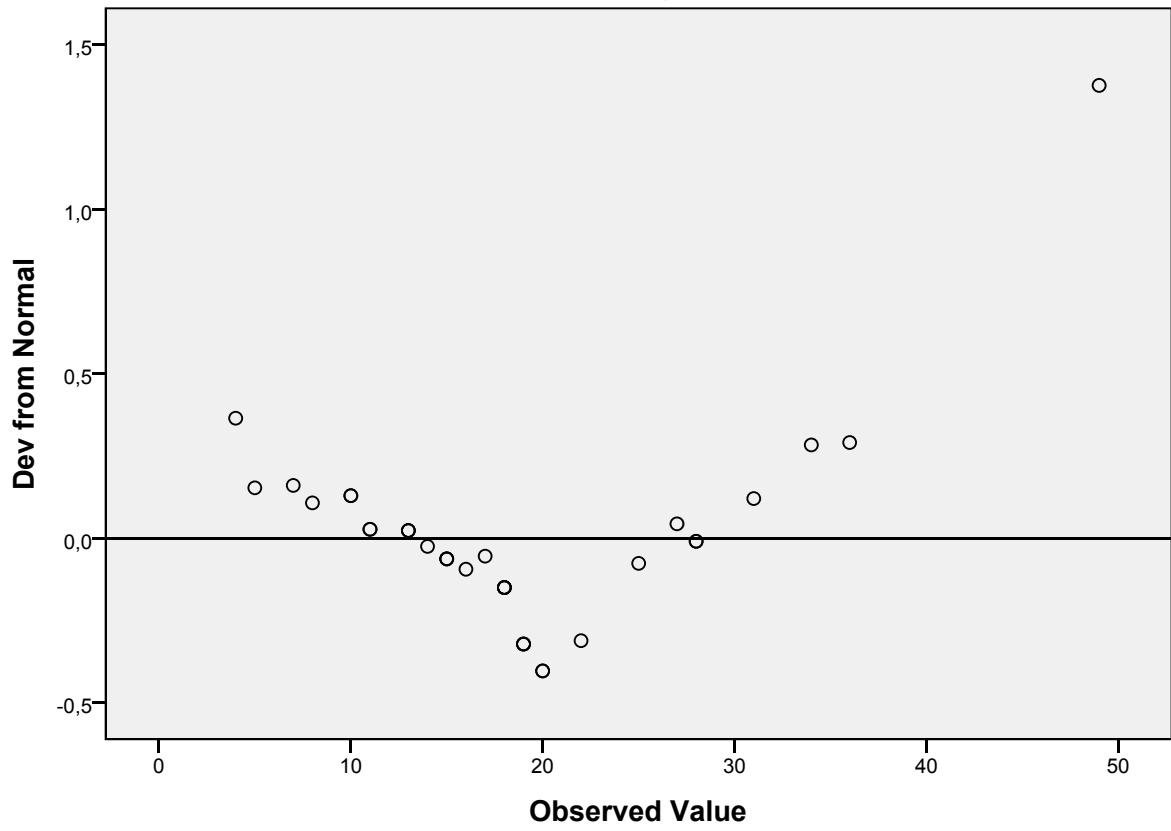

### Detrended Normal Q-Q Plot of T in-brace

for VAR00021= 2,00

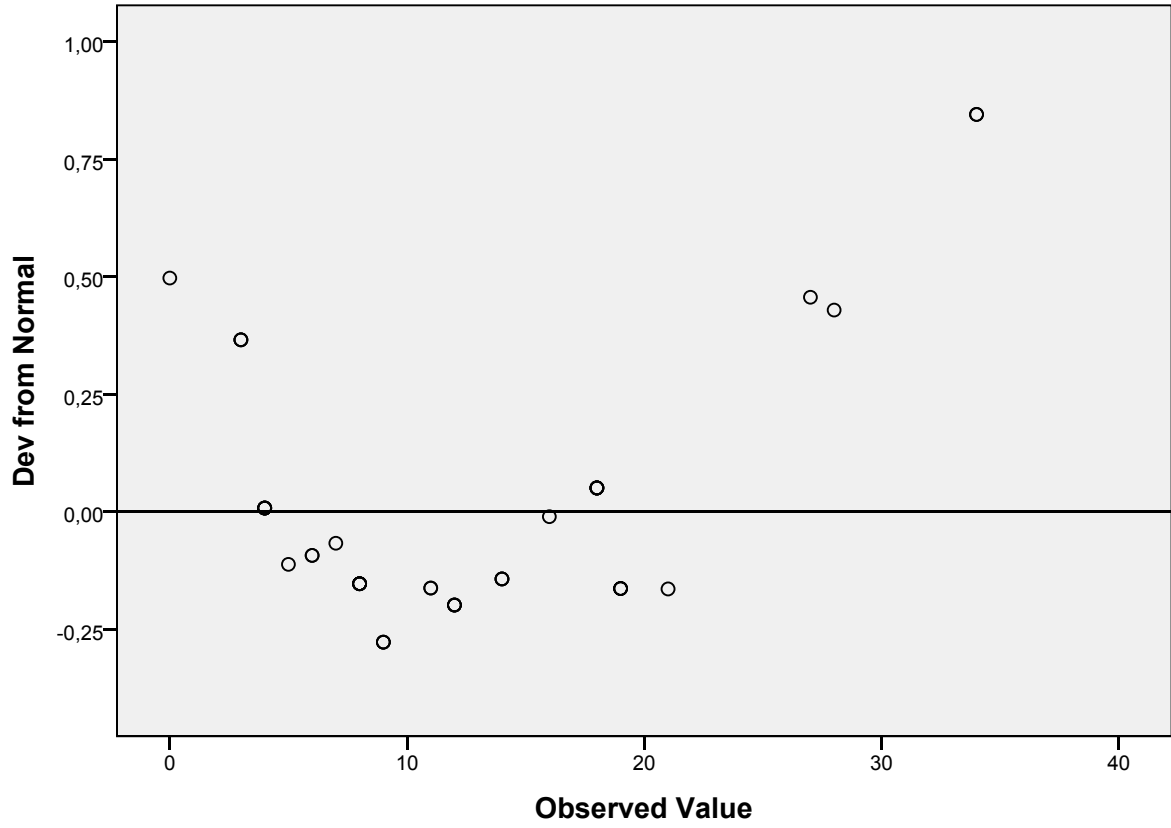



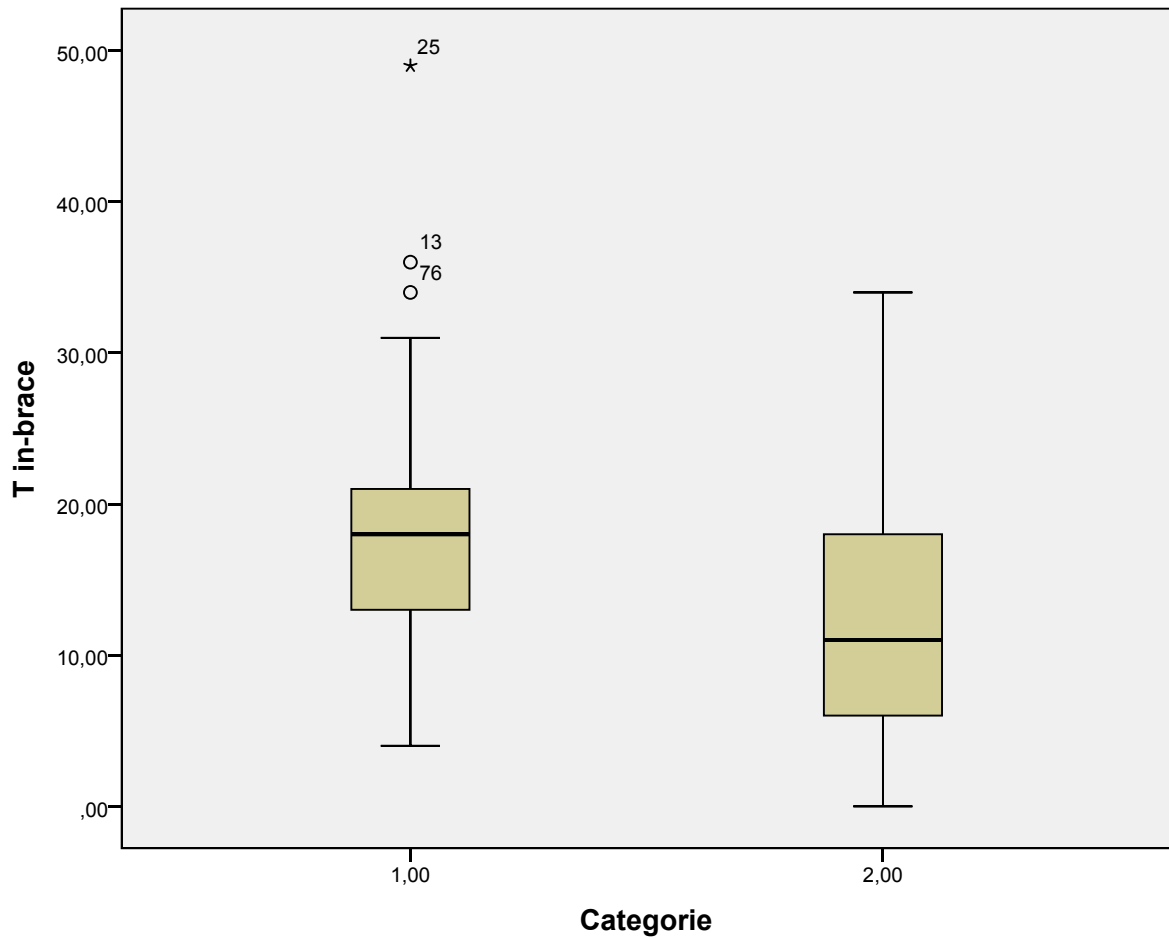

## Lin-brace

### Stem-and-Leaf Plots

Lin-brace Stem-and-Leaf Plot for  
VAR00021= 1,00

| Frequency | Stem &   | Leaf         |
|-----------|----------|--------------|
| 1,00      | 0 .      | 4            |
| 9,00      | 0 .      | 556667789    |
| 12,00     | 1 .      | 000122334444 |
| 9,00      | 1 .      | 6778889999   |
| 2,00      | 2 .      | 04           |
| 2,00      | 2 .      | 69           |
| 1,00      | Extremes | (>=35)       |

Stem width: 10,00  
Each leaf: 1 case(s)

Lin-brace Stem-and-Leaf Plot for  
VAR00021= 2,00

| Frequency | Stem & | Leaf    |
|-----------|--------|---------|
| 5,00      | 0 .    | 00001   |
| 7,00      | 0 .    | 2233333 |
| 2,00      | 0 .    | 45      |
| 5,00      | 0 .    | 66677   |
| 5,00      | 0 .    | 88899   |
| 4,00      | 1 .    | 0011    |
| 1,00      | 1 .    | 3       |
| 6,00      | 1 .    | 455555  |
| 1,00      | 1 .    | 6       |
| ,00       | 1 .    |         |
| 2,00      | 2 .    | 00      |
| 4,00      | 2 .    | 2233    |
| 2,00      | 2 .    | 45      |
| 1,00      | 2 .    | 7       |
| ,00       | 2 .    |         |
| 1,00      | 3 .    | 0       |

Stem width: 10,00  
Each leaf: 1 case(s)

## Normal Q-Q Plots

### Normal Q-Q Plot of Lin-brace

for VAR00021= 1,00

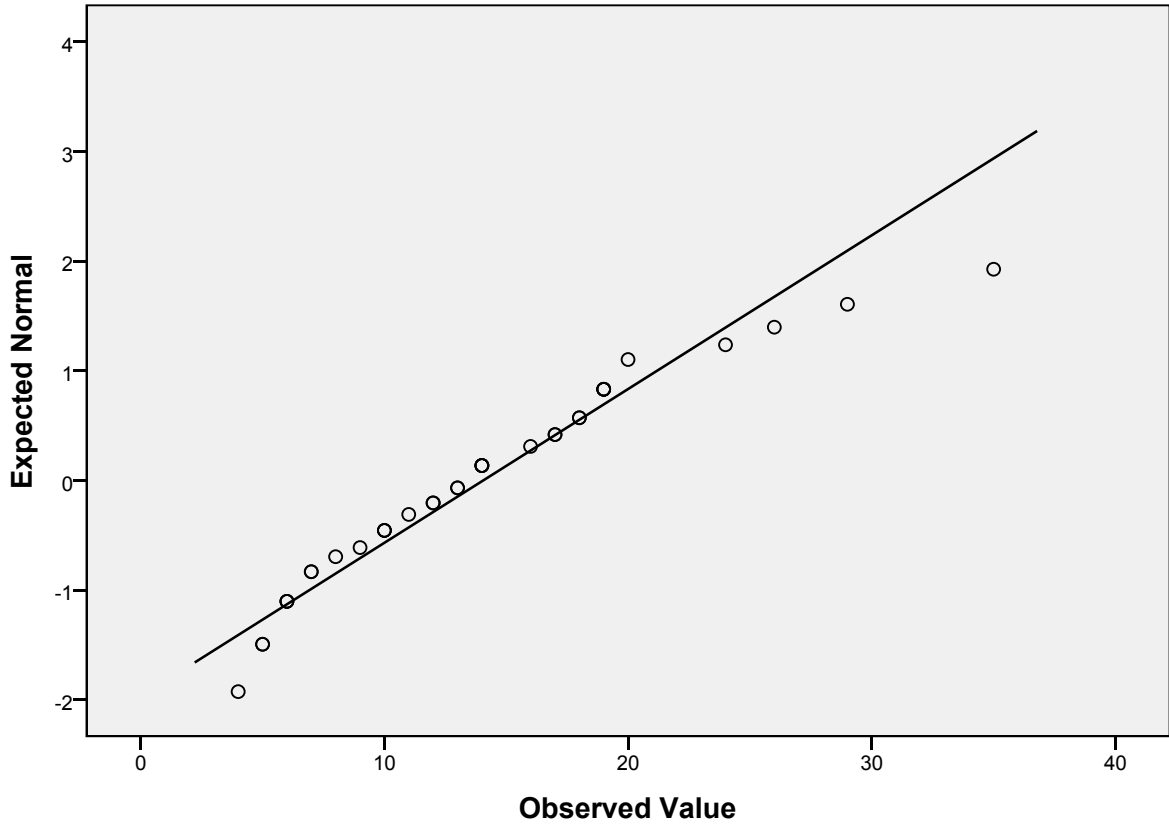

### Normal Q-Q Plot of Lin-brace

for VAR00021= 2,00

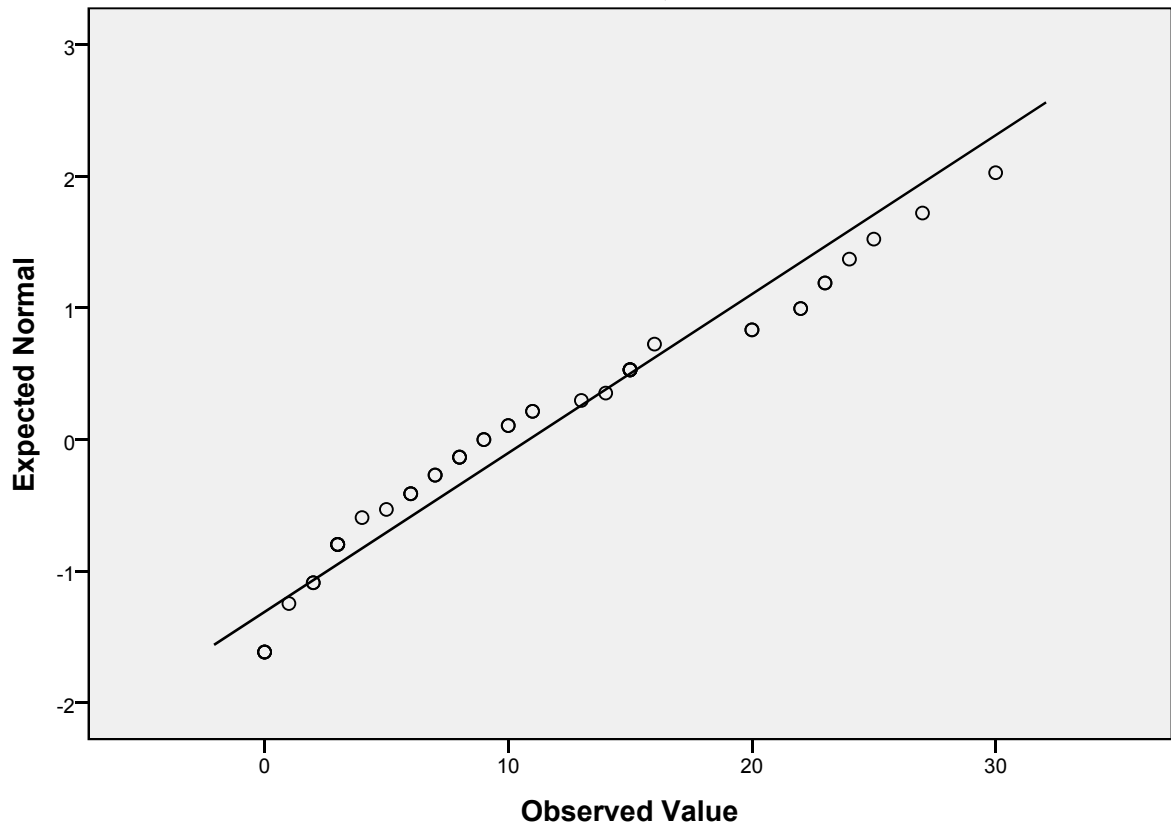

### Detrended Normal Q-Q Plots

**Detrended Normal Q-Q Plot of Lin-brace**

for VAR00021= 1,00

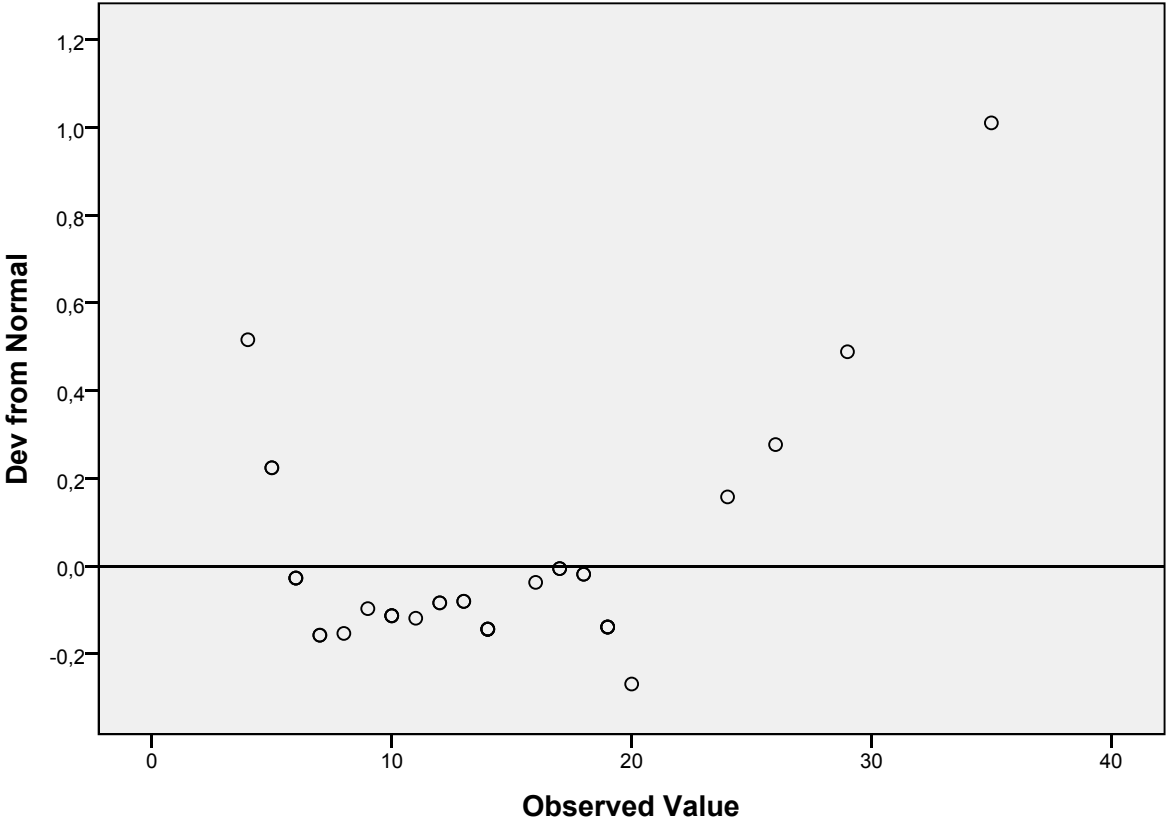

**Detrended Normal Q-Q Plot of Lin-brace**

for VAR00021= 2,00

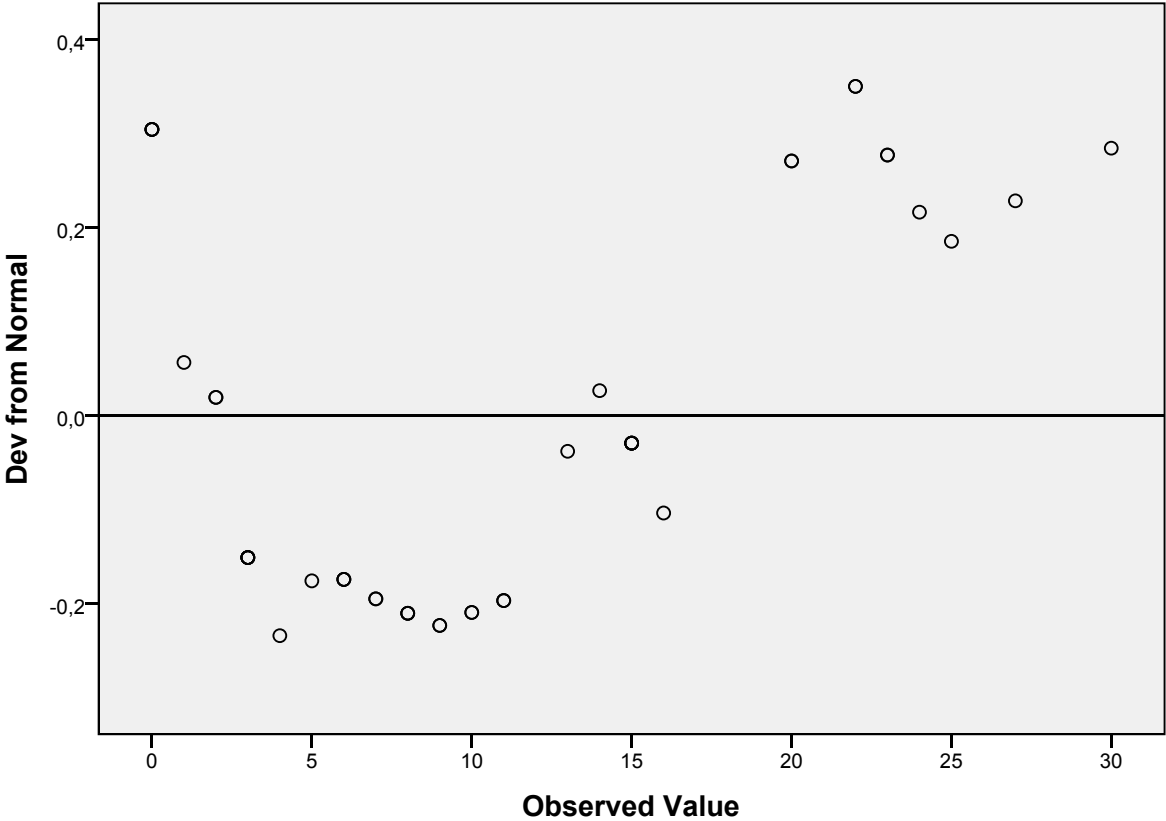

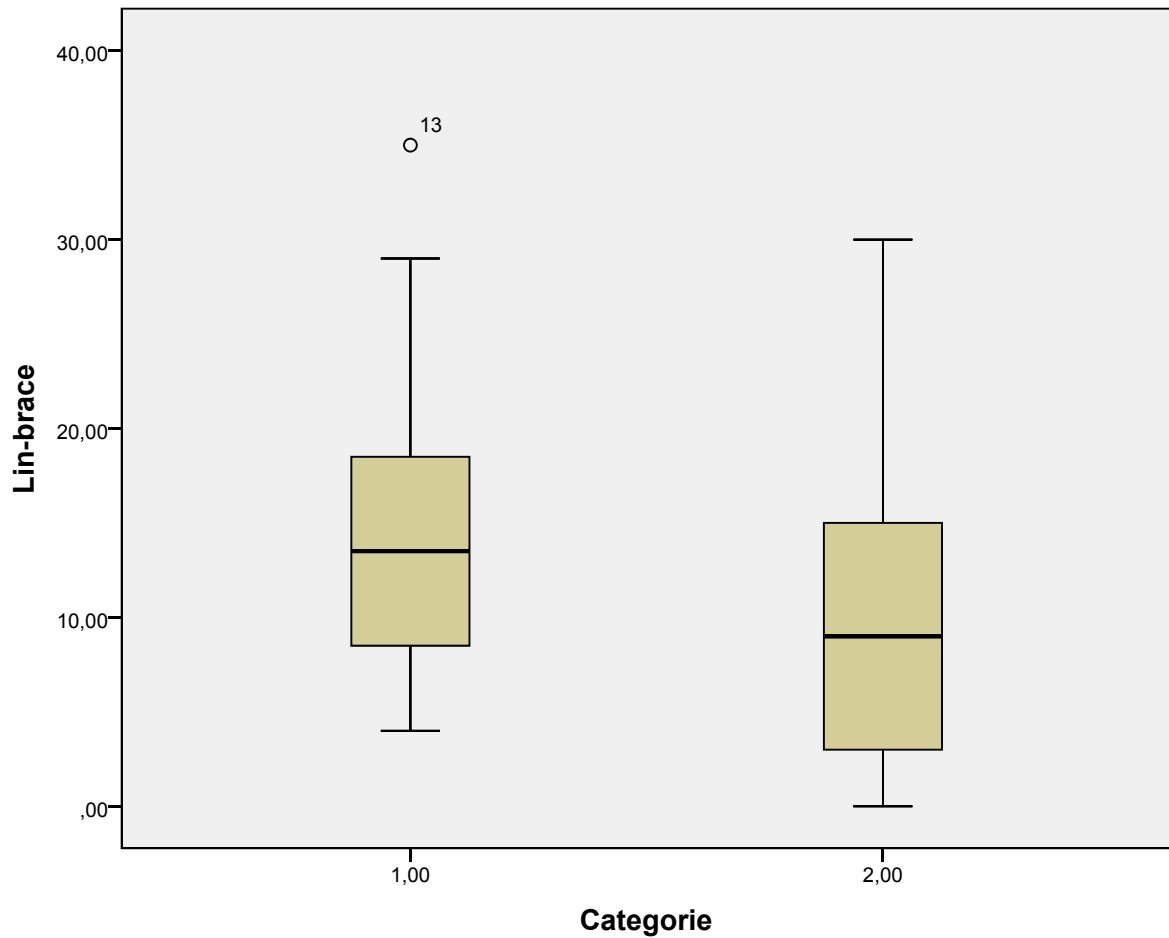

## T 6 months

### Stem-and-Leaf Plots

T 6 months Stem-and-Leaf Plot for  
VAR00021= 1,00

| Frequency | Stem &   | Leaf       |
|-----------|----------|------------|
| 4,00      | 1 .      | 0024       |
| 10,00     | 1 .      | 5567899999 |
| 5,00      | 2 .      | 12444      |
| 8,00      | 2 .      | 55578889   |
| 3,00      | 3 .      | 013        |
| 3,00      | 3 .      | 678        |
| 3,00      | Extremes | (>=52)     |

Stem width: 10,00  
Each leaf: 1 case(s)

T 6 months Stem-and-Leaf Plot for  
VAR00021= 2,00

| Frequency | Stem &   | Leaf         |
|-----------|----------|--------------|
| 1,00      | 0 .      | 2            |
| 4,00      | 0 .      | 7899         |
| 7,00      | 1 .      | 0022234      |
| 12,00     | 1 .      | 666777888999 |
| 8,00      | 2 .      | 00001133     |
| 7,00      | 2 .      | 6688899      |
| 1,00      | 3 .      | 2            |
| 2,00      | 3 .      | 99           |
| 2,00      | 4 .      | 11           |
| 1,00      | 4 .      | 5            |
| 1,00      | Extremes | (>=52)       |

Stem width: 10,00  
Each leaf: 1 case(s)

## Normal Q-Q Plots



### Normal Q-Q Plot of T 6 months

for VAR00021= 1,00

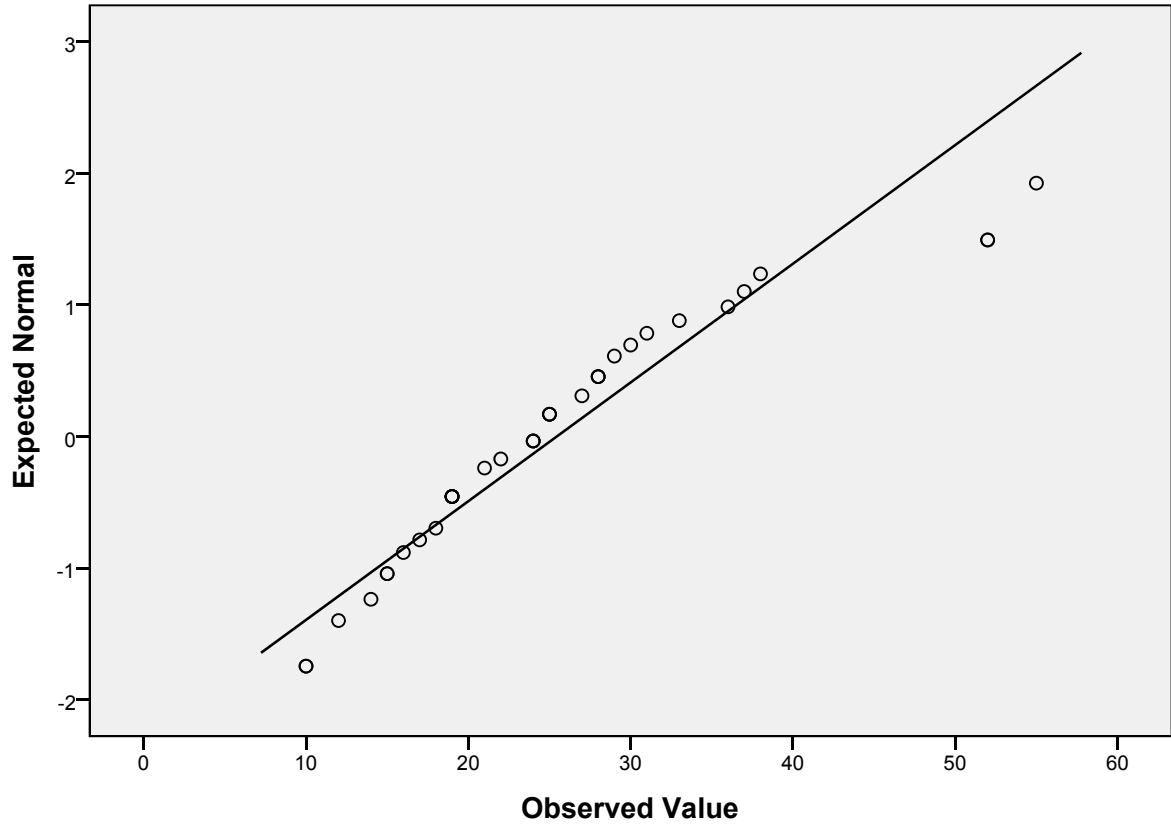

### Normal Q-Q Plot of T 6 months

for VAR00021= 2,00

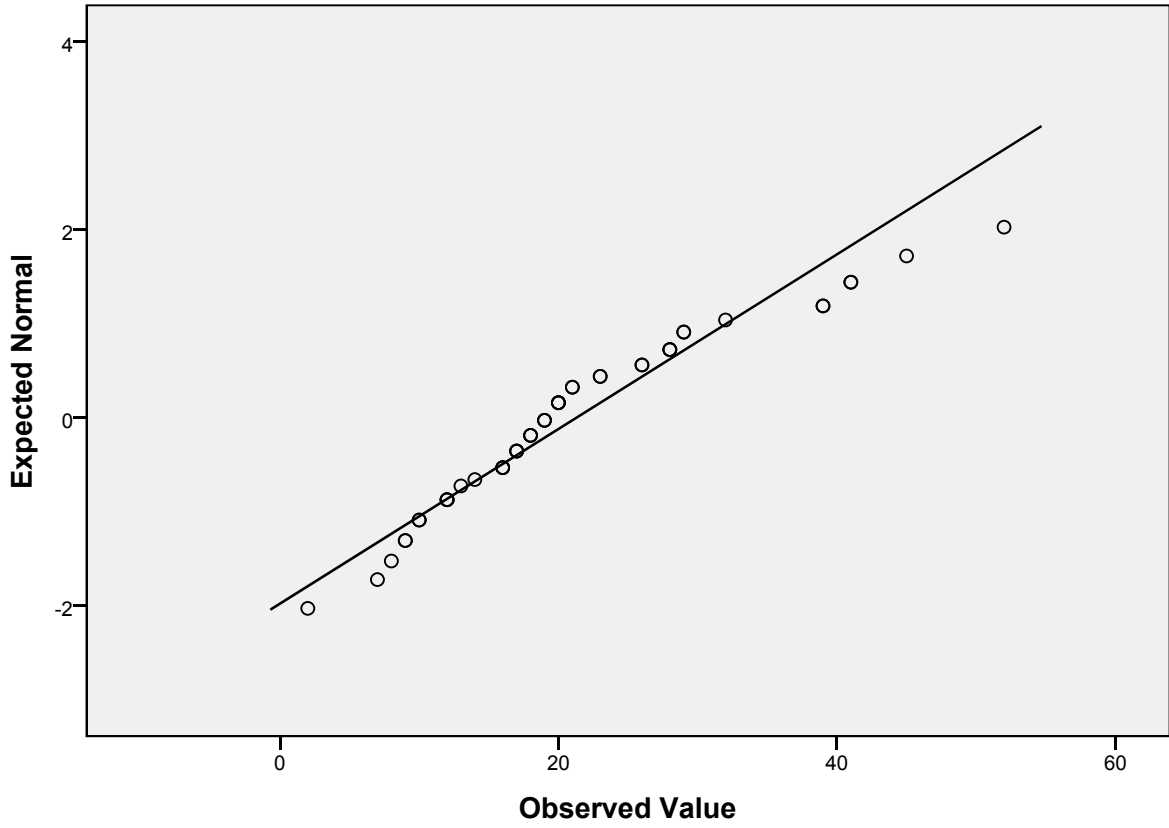

### Detrended Normal Q-Q Plots

### Detrended Normal Q-Q Plot of T 6 months

for VAR00021= 1,00

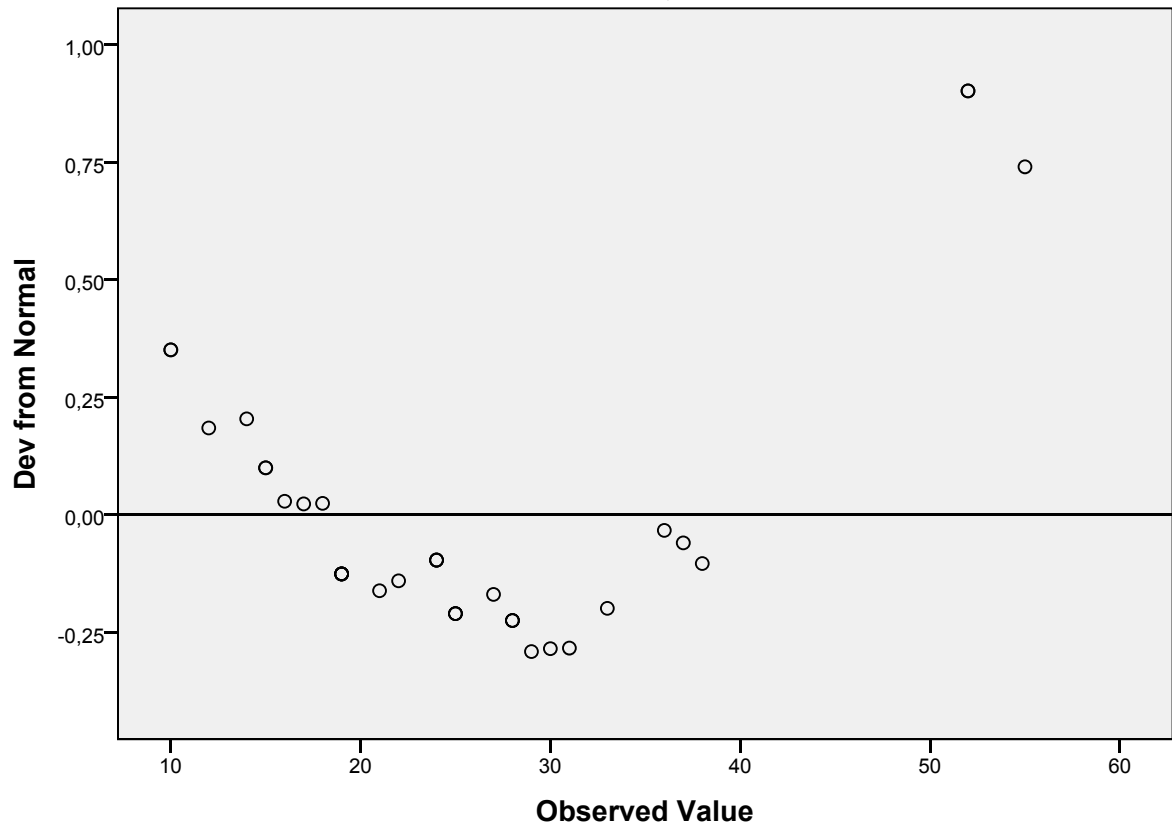

### Detrended Normal Q-Q Plot of T 6 months

for VAR00021= 2,00

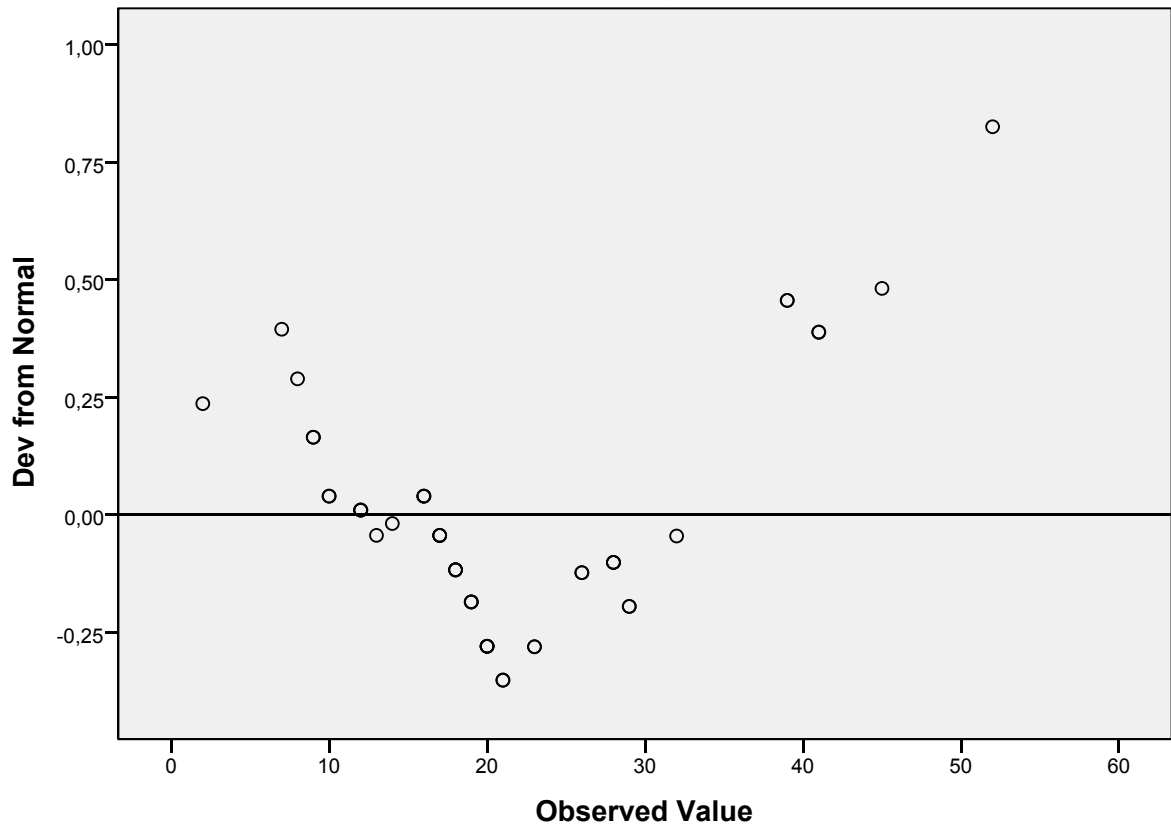

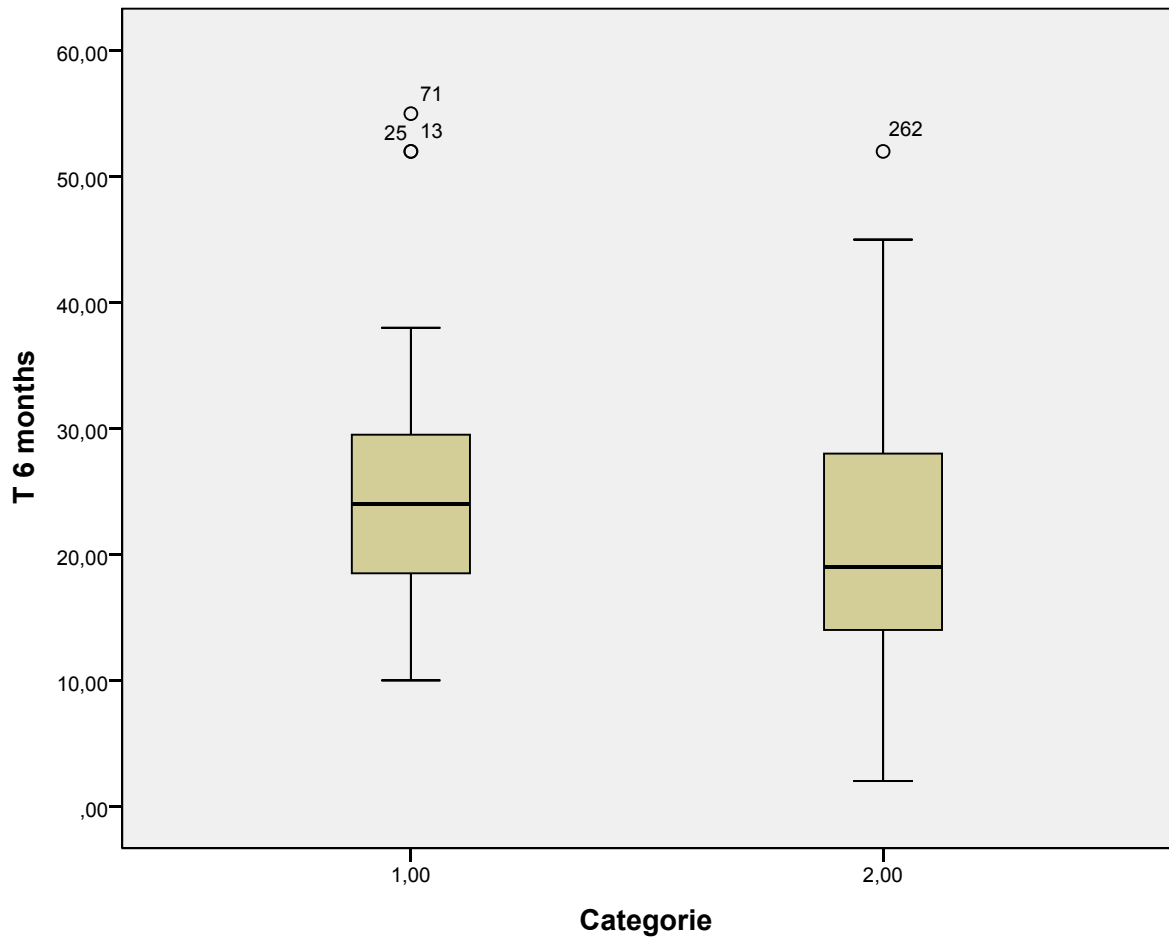

## L 6 months

### Stem-and-Leaf Plots

L 6 months Stem-and-Leaf Plot for  
VAR00021= 1,00

| Frequency | Stem &   | Leaf        |
|-----------|----------|-------------|
| 2,00      | 0 .      | 99          |
| 6,00      | 1 .      | 000234      |
| 11,00     | 1 .      | 55567778899 |
| 8,00      | 2 .      | 00112233    |
| 5,00      | 2 .      | 56679       |
| 2,00      | 3 .      | 23          |
| 2,00      | Extremes | (>=40)      |

Stem width: 10,00  
Each leaf: 1 case(s)

L 6 months Stem-and-Leaf Plot for  
VAR00021= 2,00

| Frequency | Stem & | Leaf          |
|-----------|--------|---------------|
| 1,00      | 0 .    | 3             |
| 4,00      | 0 .    | 6999          |
| 10,00     | 1 .    | 0012223333    |
| 13,00     | 1 .    | 5566777888889 |
| 4,00      | 2 .    | 0001          |
| 6,00      | 2 .    | 555689        |
| 5,00      | 3 .    | 02234         |
| 2,00      | 3 .    | 69            |
| 1,00      | 4 .    | 0             |

Stem width: 10,00  
Each leaf: 1 case(s)

## Normal Q-Q Plots

### Normal Q-Q Plot of L 6 months

for VAR00021= 1,00

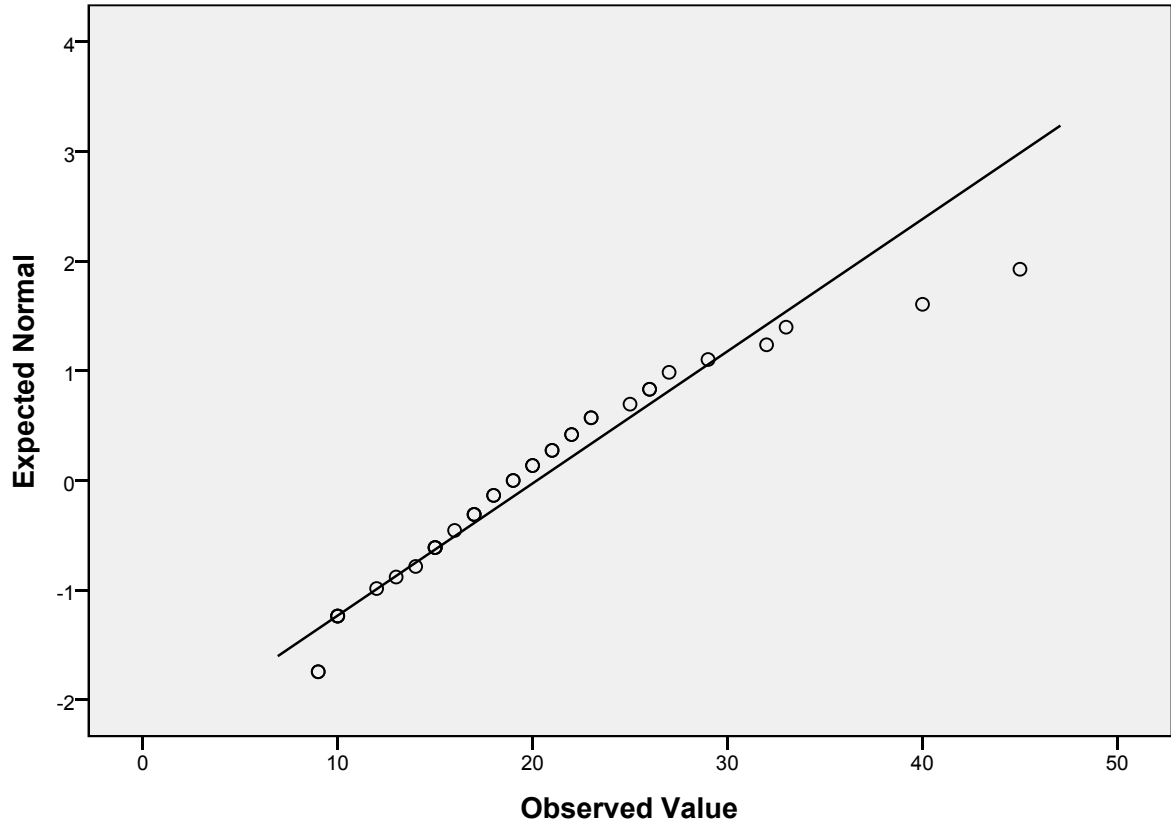

### Normal Q-Q Plot of L 6 months

for VAR00021= 2,00

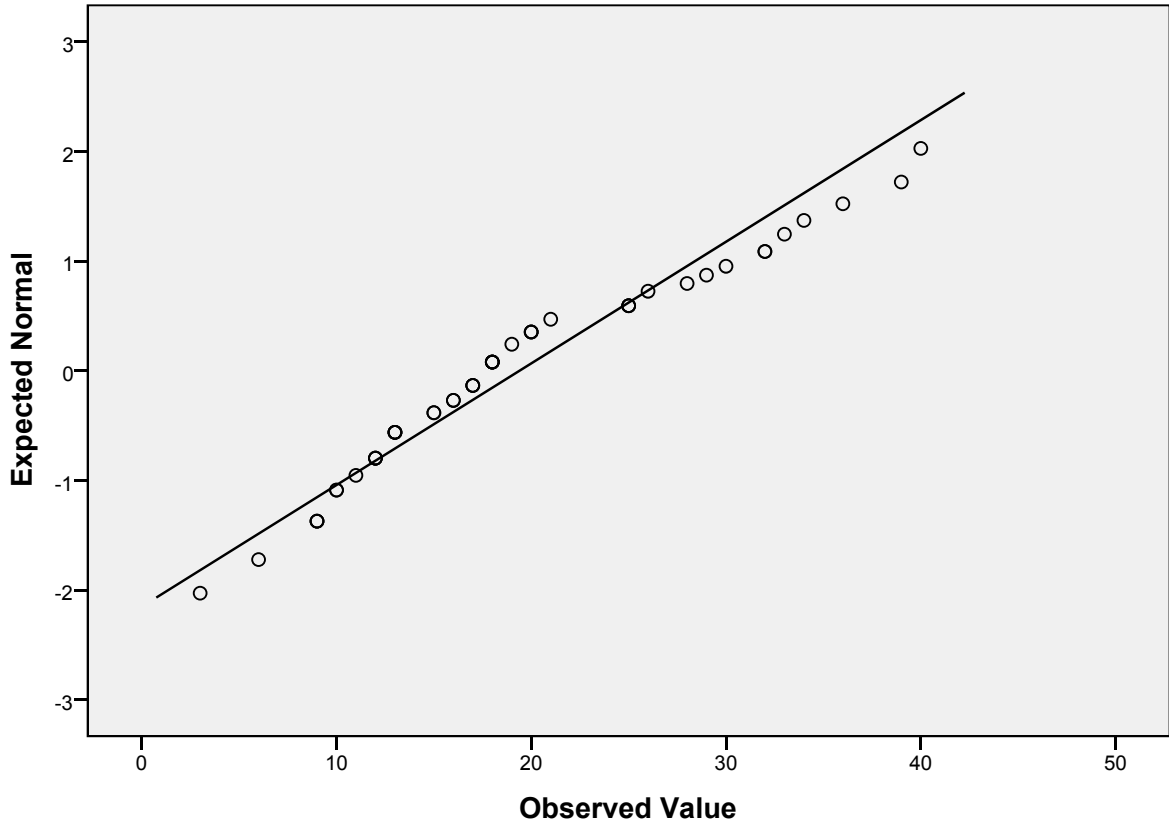

### Detrended Normal Q-Q Plots



### Detrended Normal Q-Q Plot of L 6 months

for VAR00021= 1,00

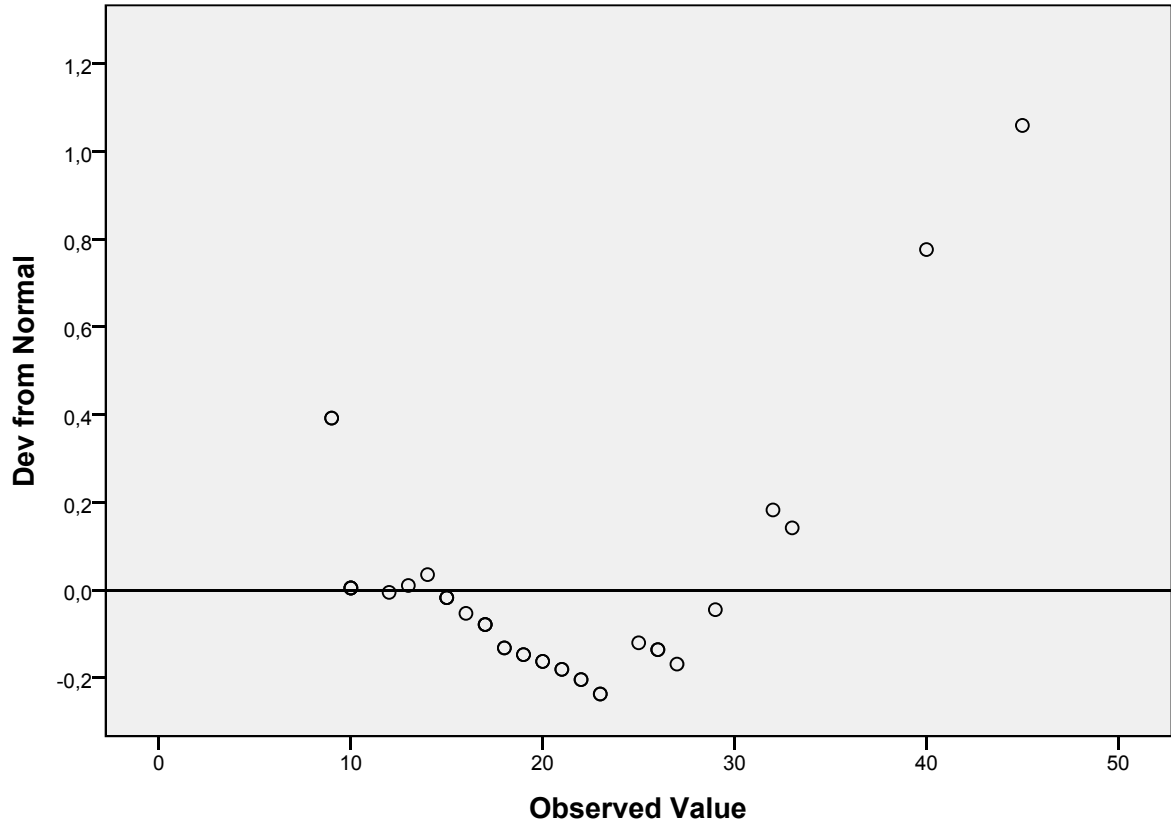

### Detrended Normal Q-Q Plot of L 6 months

for VAR00021= 2,00

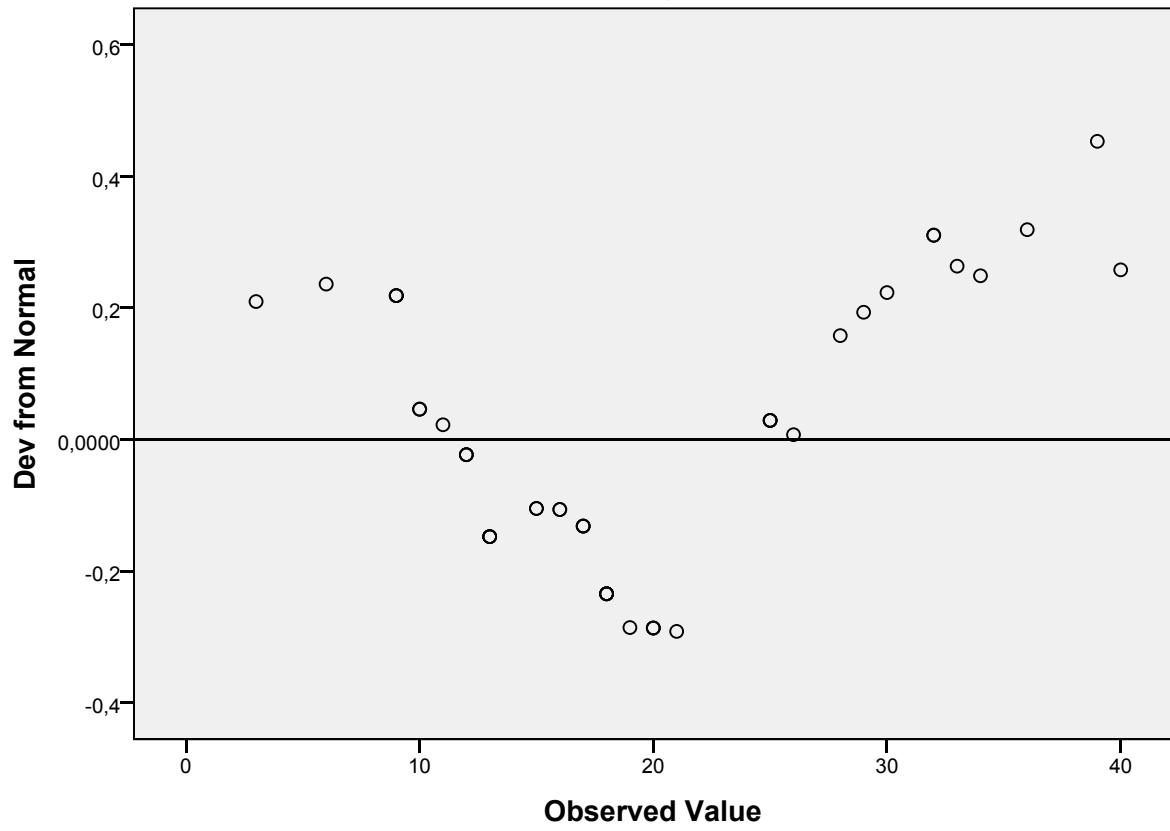

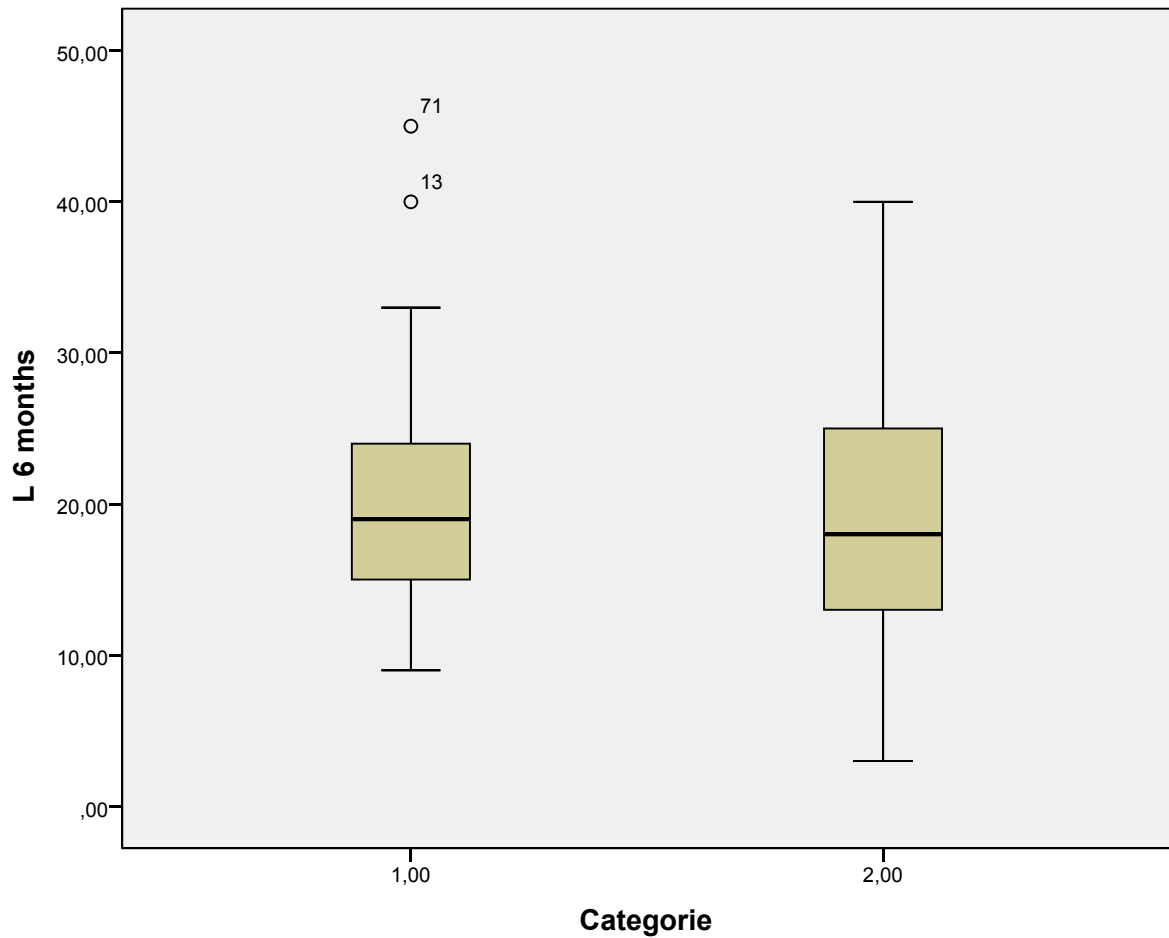

## T 1 year

### Stem-and-Leaf Plots

T 1 year Stem-and-Leaf Plot for  
VAR00021= 1,00

| Frequency | Stem &   | Leaf     |
|-----------|----------|----------|
| 1,00      | 1 .      | 4        |
| 8,00      | 1 .      | 56677889 |
| 7,00      | 2 .      | 0002234  |
| 7,00      | 2 .      | 5777899  |
| 5,00      | 3 .      | 00113    |
| 1,00      | 3 .      | 6        |
| 3,00      | 4 .      | 013      |
| 1,00      | 4 .      | 7        |
| 3,00      | Extremes | (>=52)   |

Stem width: 10,00  
Each leaf: 1 case(s)

T 1 year Stem-and-Leaf Plot for  
VAR00021= 2,00

| Frequency | Stem & | Leaf        |
|-----------|--------|-------------|
| ,00       | 0 .    |             |
| 4,00      | 0 .    | 5777        |
| 5,00      | 1 .    | 01234       |
| 11,00     | 1 .    | 55678899999 |
| 10,00     | 2 .    | 0000012223  |
| 5,00      | 2 .    | 58889       |
| 6,00      | 3 .    | 111344      |
| 3,00      | 3 .    | 799         |
| 2,00      | 4 .    | 13          |

Stem width: 10,00  
Each leaf: 1 case(s)

## Normal Q-Q Plots

**Normal Q-Q Plot of T 1 year**  
for VAR00021= 1,00

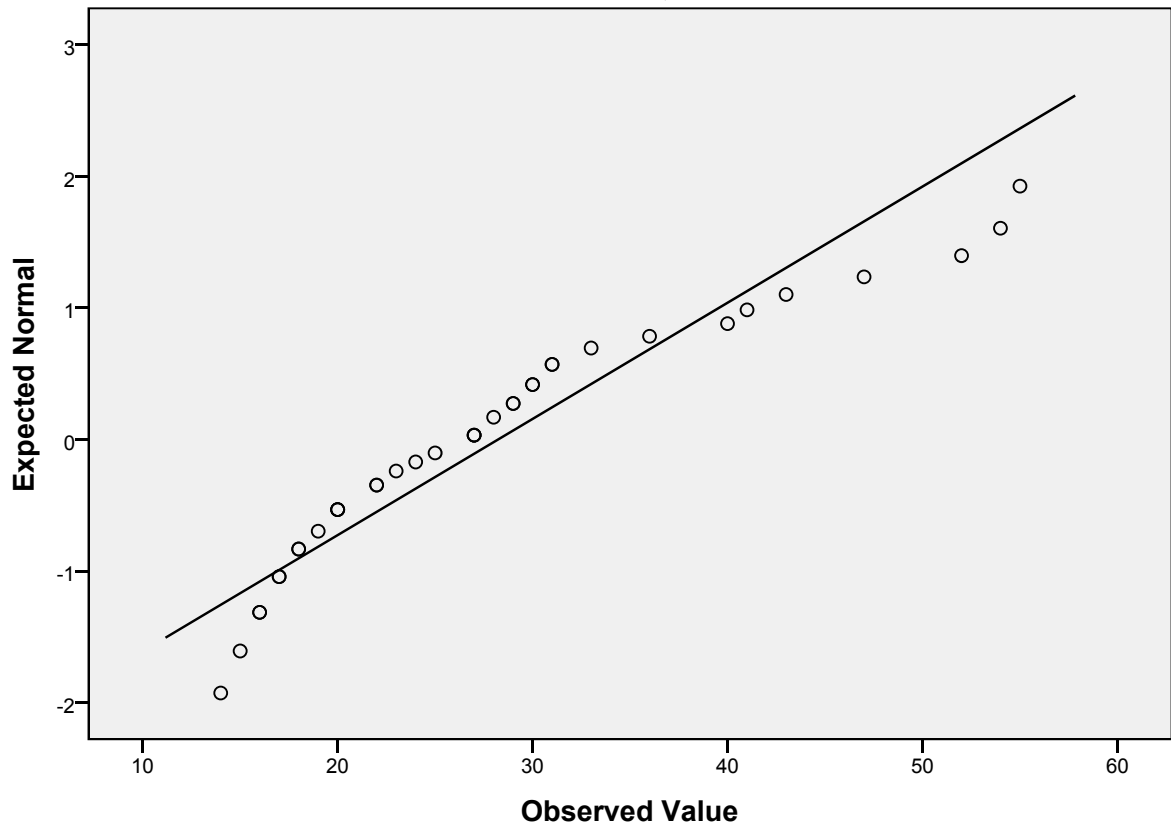

### Normal Q-Q Plot of T 1 year

for VAR00021= 2,00

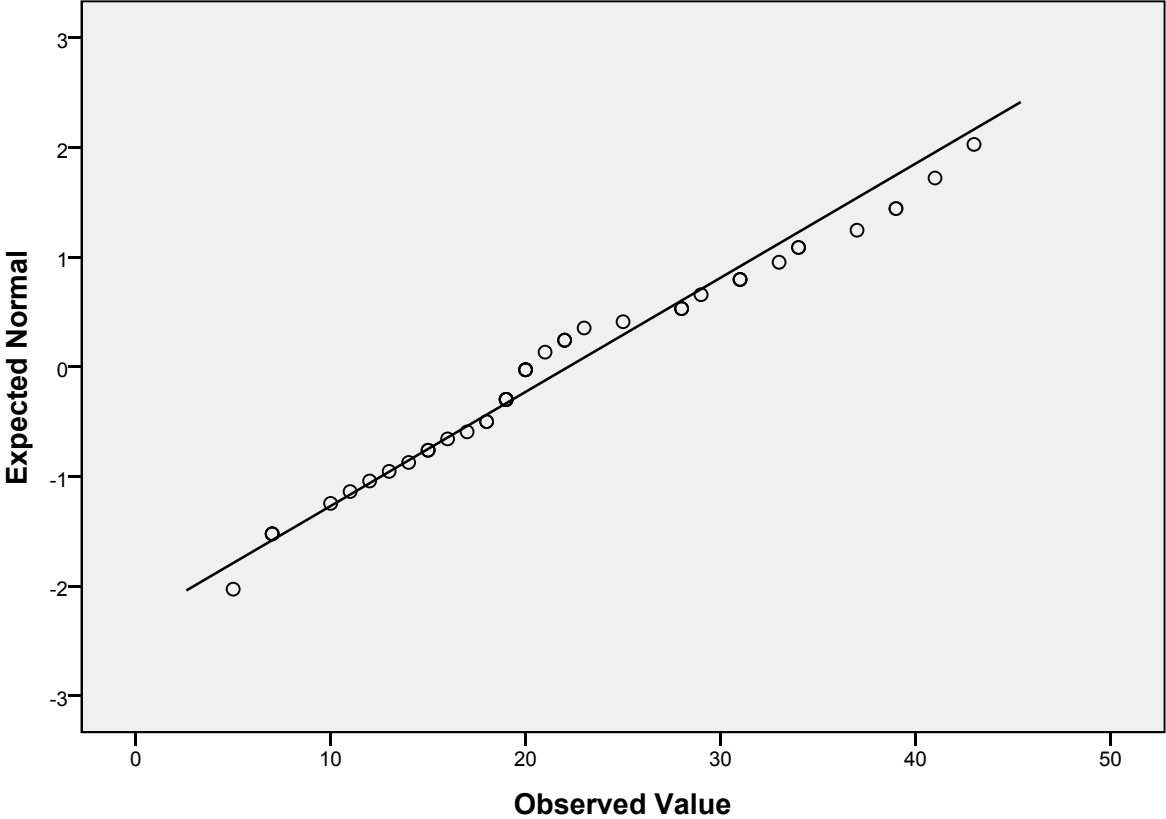

### Detrended Normal Q-Q Plots

### Detrended Normal Q-Q Plot of T 1 year

for VAR00021= 1,00

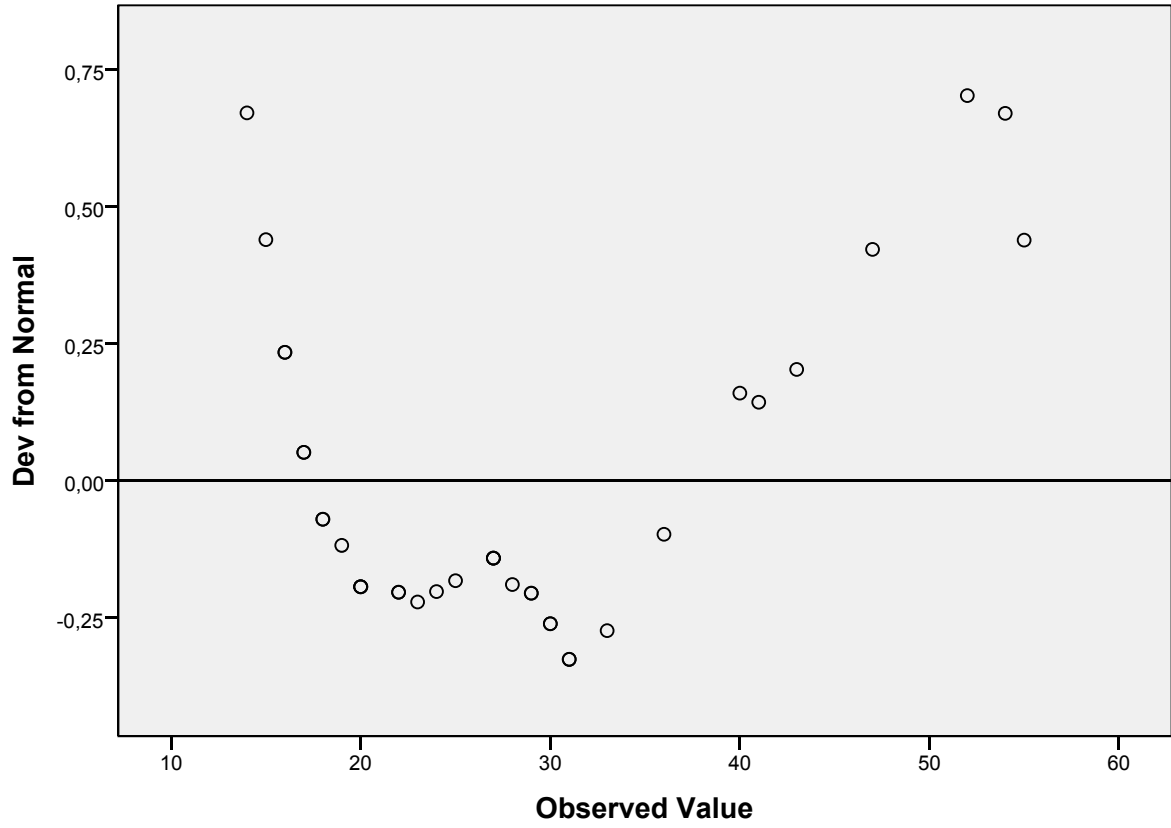

### Detrended Normal Q-Q Plot of T 1 year

for VAR00021= 2,00

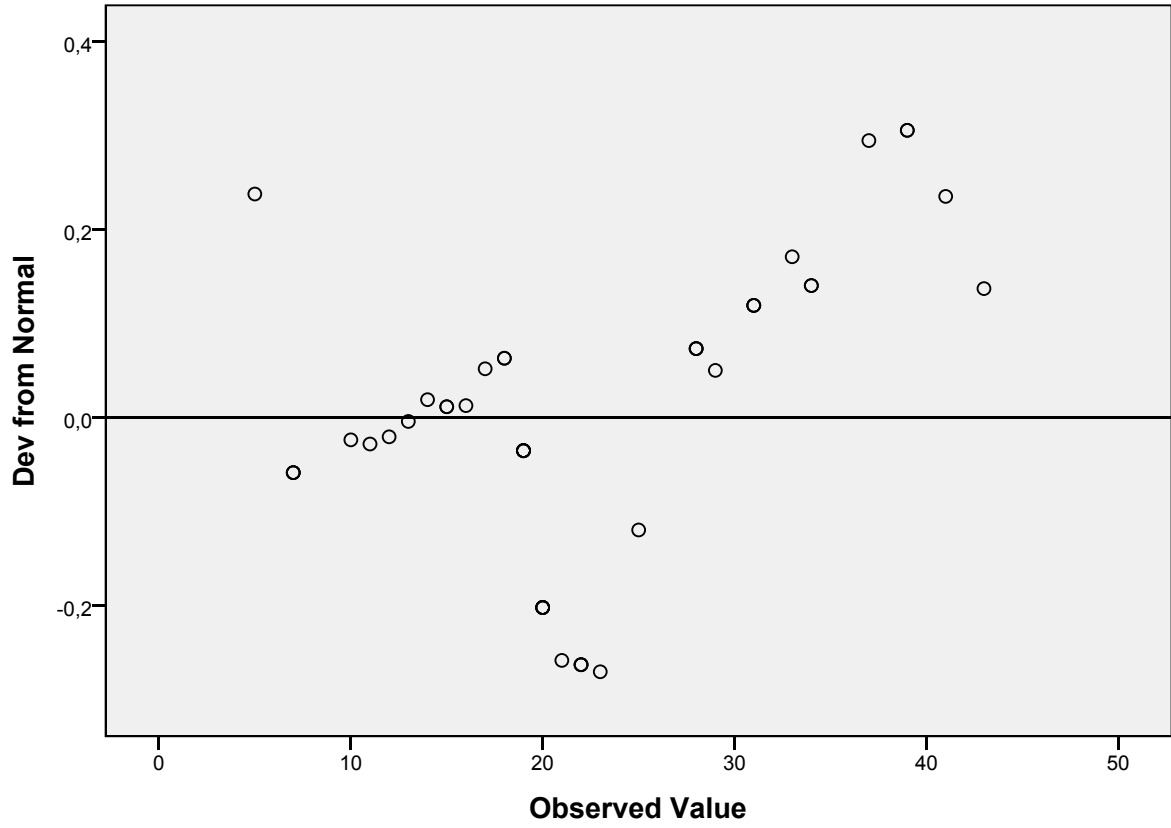



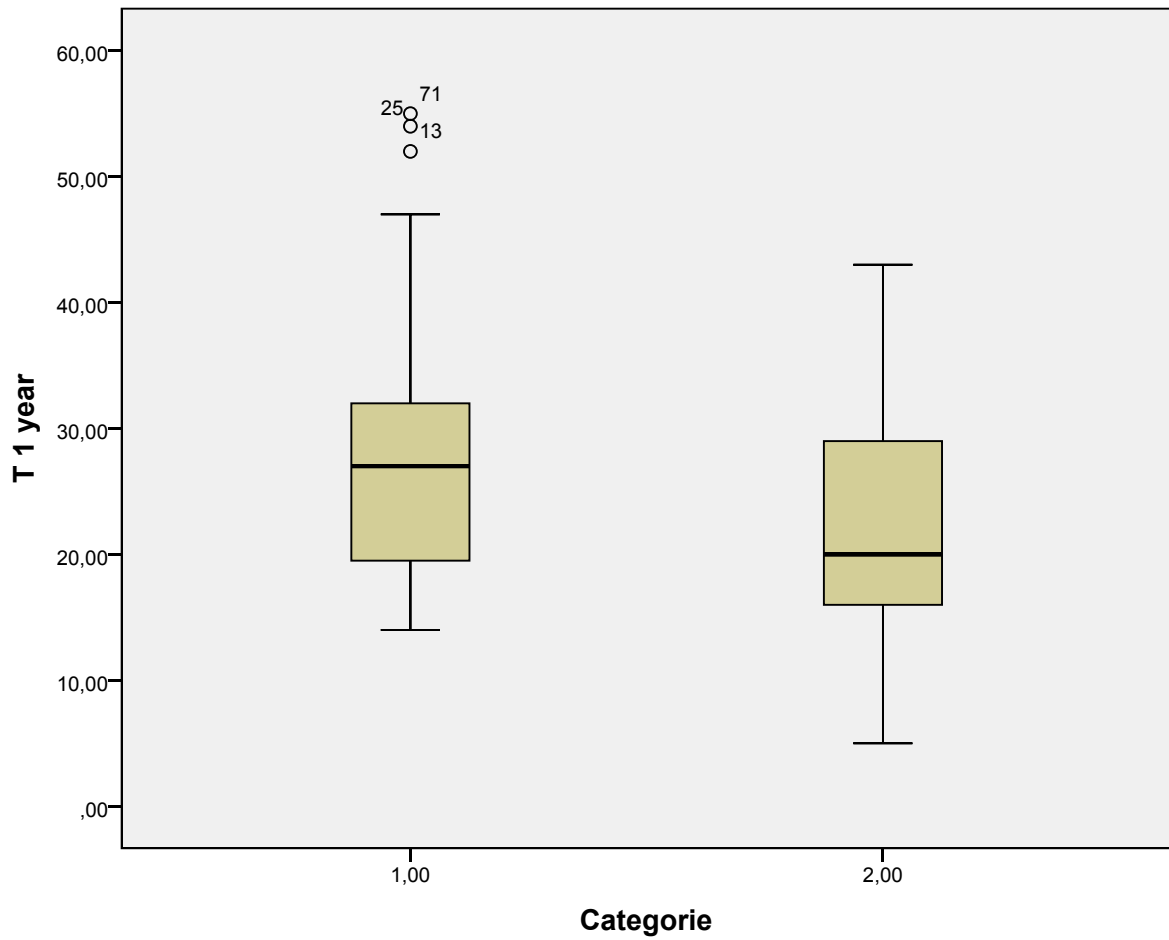

## L 1 year

### Stem-and-Leaf Plots

L 1 year Stem-and-Leaf Plot for  
VAR00021= 1,00

| Frequency | Stem &   | Leaf         |
|-----------|----------|--------------|
| 6,00      | 1 .      | 023444       |
| 8,00      | 1 .      | 55566779     |
| 12,00     | 2 .      | 000011223444 |
| 5,00      | 2 .      | 56888        |
| 3,00      | 3 .      | 003          |
| 2,00      | Extremes | (>=45)       |

Stem width: 10,00  
Each leaf: 1 case(s)

L 1 year Stem-and-Leaf Plot for  
 VAR00021= 2,00

| Frequency | Stem & Leaf          |
|-----------|----------------------|
| 1,00      | 0 . 2                |
| 2,00      | 0 . 68               |
| 7,00      | 1 . 0000112          |
| 16,00     | 1 . 5555566777788889 |
| 6,00      | 2 . 000123           |
| 5,00      | 2 . 56899            |
| 5,00      | 3 . 11234            |
| 2,00      | 3 . 55               |
| 2,00      | 4 . 00               |

Stem width: 10,00  
 Each leaf: 1 case(s)

### Normal Q-Q Plots

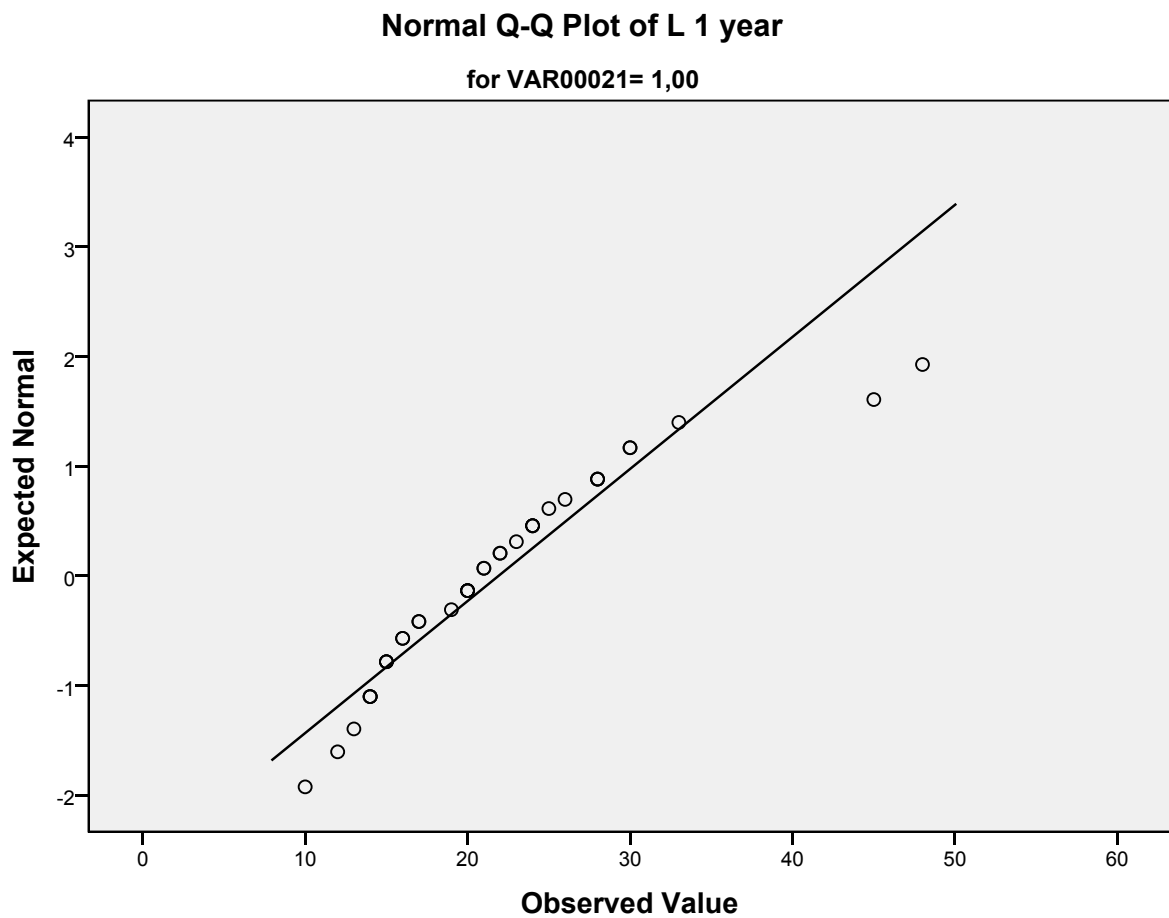

### Normal Q-Q Plot of L 1 year

for VAR00021= 2,00

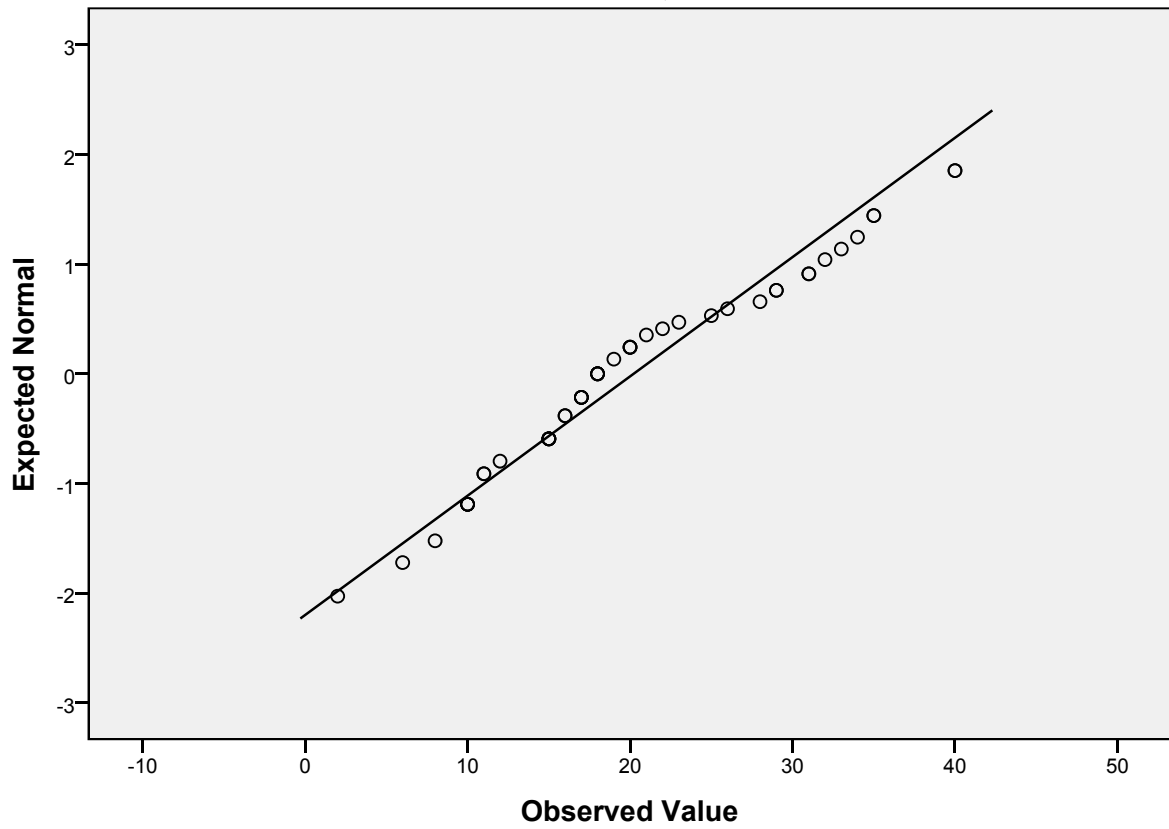

### Detrended Normal Q-Q Plots

### Detrended Normal Q-Q Plot of L 1 year

for VAR00021= 1,00

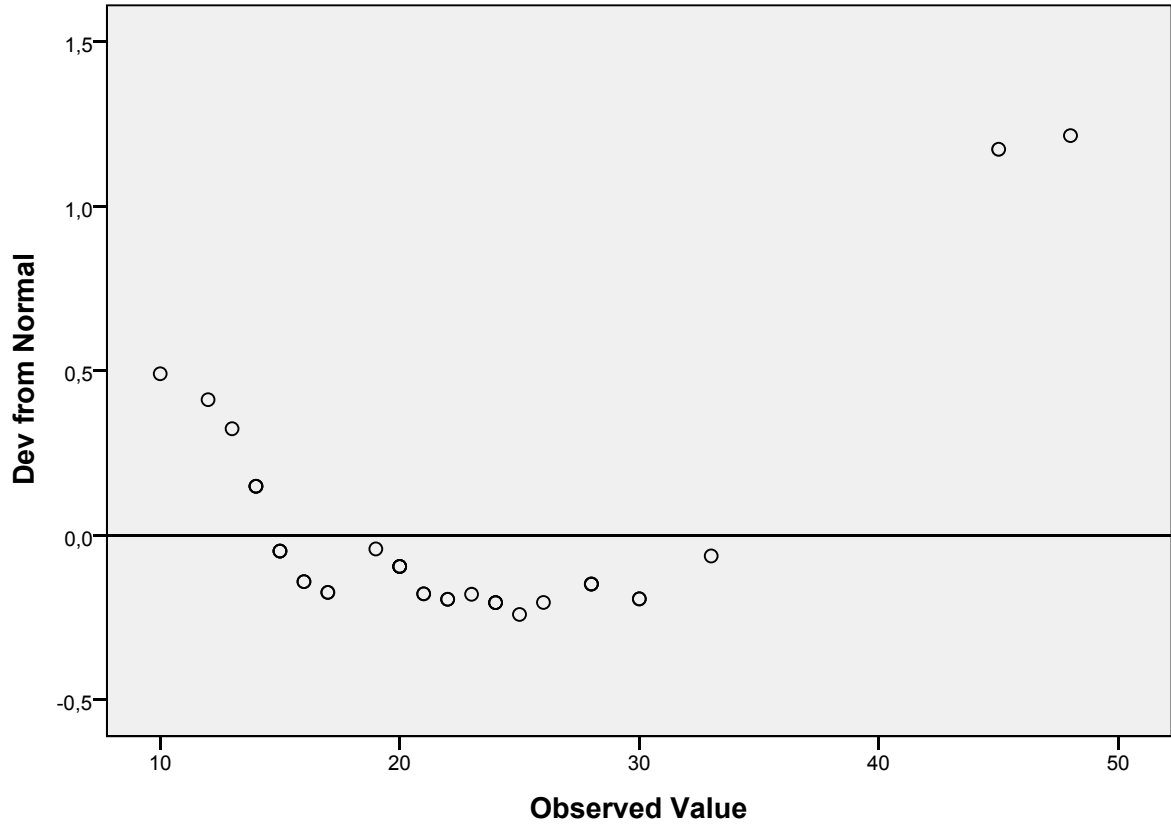

### Detrended Normal Q-Q Plot of L 1 year

for VAR00021= 2,00

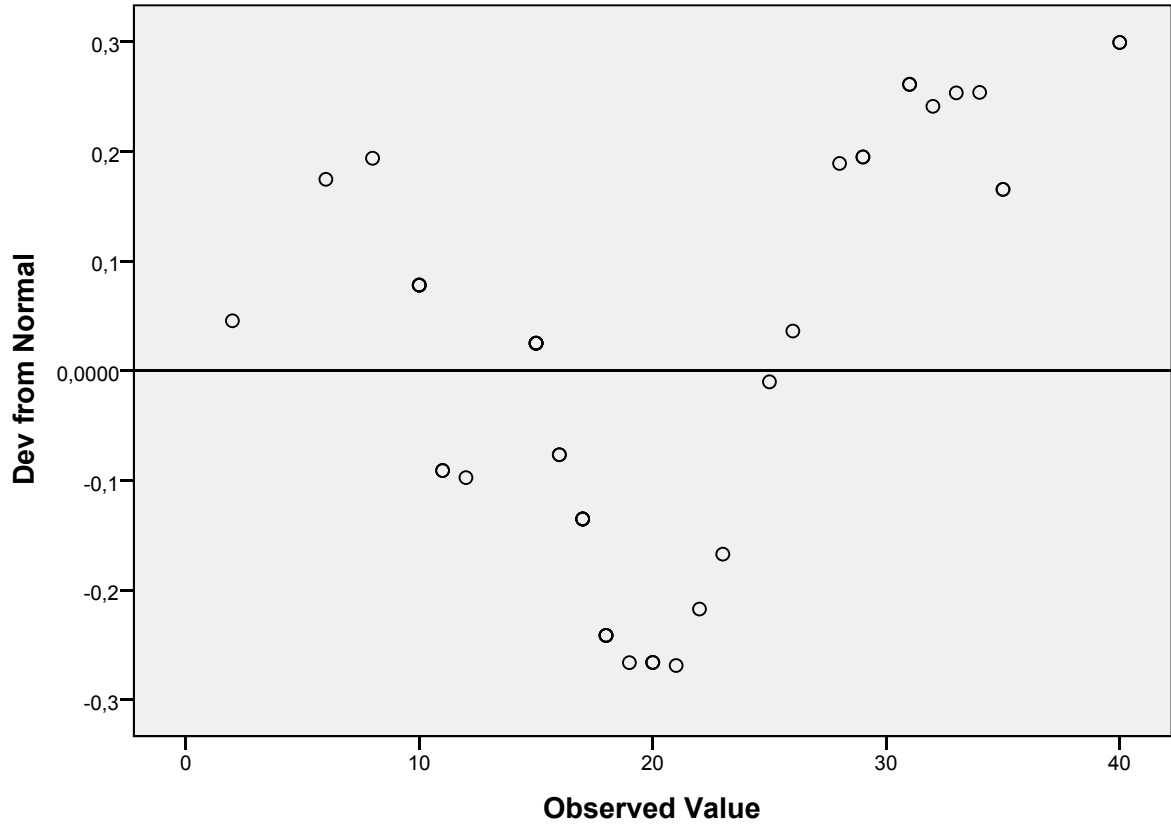

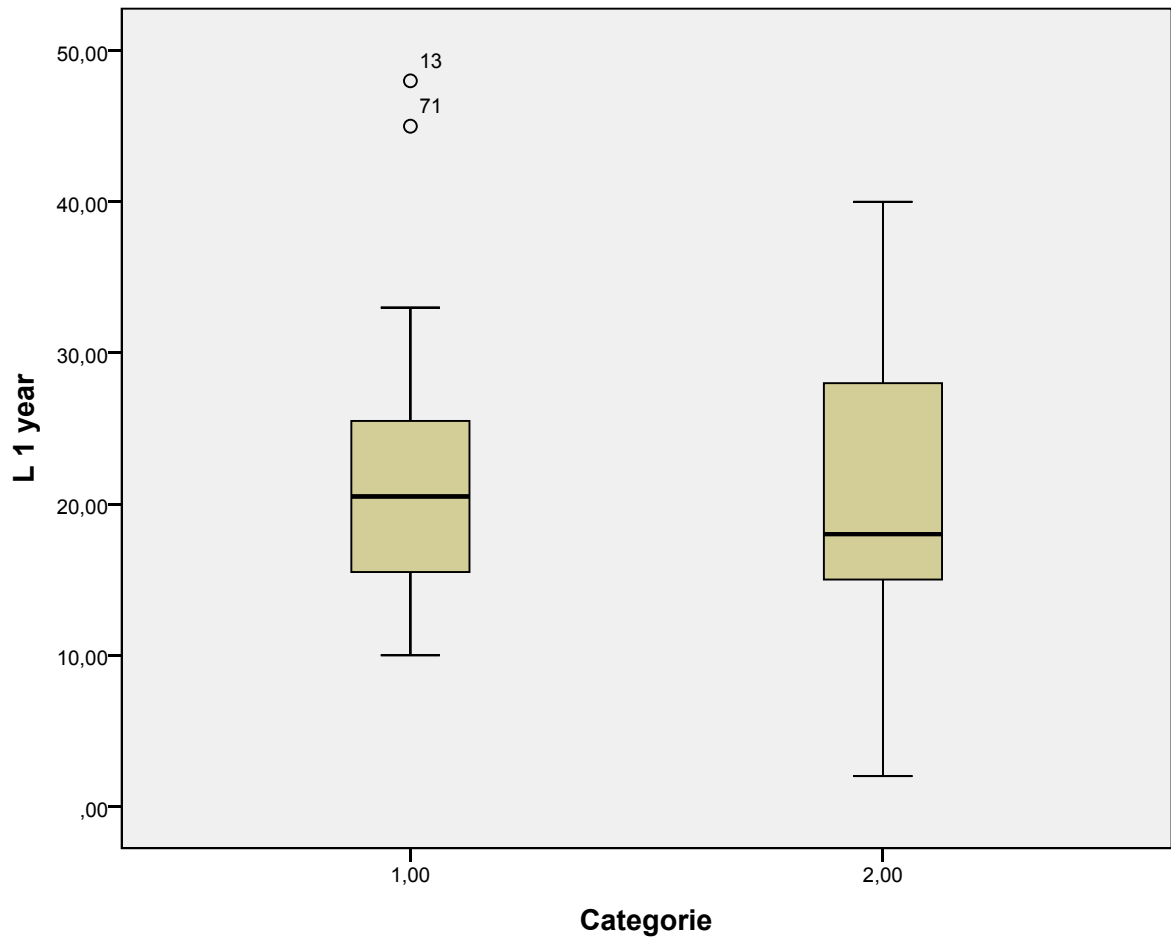

Supplement: MOESM2 [file 9773402]
