# Supplementary material for: The new Lyon ARTbrace versus the historical Lyon brace: a prospective case series of 148 consecutive scoliosis with short time results after 1 year compared with a historical retrospective case series of 100 consecutive scoliosis; SOSORT award 2015 winner
Source: Springer Nature journal article supplement (doi:10.1186/s13013-015-0047-6), 2015-08-18
Supplement: MOESM3 [file 9773402]

DESCRIPTIVES VARIABLES=VAR00006 VAR00007 VAR00010 VAR00011 VAR00012 VAR00013 VAR00014 VAR00015  
 /STATISTICS=MEAN STDDEV VARIANCE MIN MAX KURTOSIS.

## Descriptives

### Notes

|                        |                                   |                                                                                                                                                                           |
|------------------------|-----------------------------------|---------------------------------------------------------------------------------------------------------------------------------------------------------------------------|
| Output Created         |                                   | 12-JUL-2015 11:23:27                                                                                                                                                      |
| Comments               |                                   |                                                                                                                                                                           |
| Input                  | Data                              | D:\SOSORT\2015<br>Katowice\SOSORT<br>AWARD\6 months clinical.<br>sav                                                                                                      |
|                        | Active Dataset                    | Ensemble_de_données0                                                                                                                                                      |
|                        | Filter                            | <none>                                                                                                                                                                    |
|                        | Weight                            | <none>                                                                                                                                                                    |
|                        | Split File                        | <none>                                                                                                                                                                    |
|                        | N of Rows in Working<br>Data File | 242                                                                                                                                                                       |
| Missing Value Handling | Definition of Missing             | User defined missing<br>values are treated as<br>missing.                                                                                                                 |
|                        | Cases Used                        | All non-missing data are<br>used.                                                                                                                                         |
| Syntax                 |                                   | DESCRIPTIVES<br>VARIABLES=VAR00006<br>VAR00007 VAR00010<br>VAR00011 VAR00012<br>VAR00013 VAR00014<br>VAR00015<br>/STATISTICS=MEAN<br>STDDEV VARIANCE MIN<br>MAX KURTOSIS. |
| Resources              | Processor Time                    | 00:00:00,00                                                                                                                                                               |
|                        | Elapsed Time                      | 00:00:00,01                                                                                                                                                               |

[Ensemble\_de\_données0] D:\SOSORT\2015 Katowice\SOSORT AWARD\6 months clinical.sav

**Descriptive Statistics**

|                    | N         | Minimum   | Maximum   | Mean      | Std. Deviation | Variance  |
|--------------------|-----------|-----------|-----------|-----------|----------------|-----------|
|                    | Statistic | Statistic | Statistic | Statistic | Statistic      | Statistic |
| TrhT0              | 178       | 5         | 50        | 23,49     | 9,060          | 82,082    |
| TbuT0              | 178       | 1         | 25        | 10,10     | 4,018          | 16,143    |
| LrhT0              | 156       | 2         | 35        | 16,95     | 7,622          | 58,088    |
| LbuT0              | 156       | 0         | 21        | 7,50      | 3,539          | 12,523    |
| TrhT2              | 178       | 0         | 40        | 13,08     | 8,081          | 65,309    |
| TbuT2              | 178       | 0         | 25        | 6,35      | 3,887          | 15,111    |
| LrhT2              | 156       | 0         | 35        | 6,21      | 5,568          | 31,003    |
| LbuT2              | 156       | 0         | 15        | 2,86      | 2,937          | 8,625     |
| Valid N (listwise) | 94        |           |           |           |                |           |

**Descriptive Statistics**

|                    | Kurtosis  |            |
|--------------------|-----------|------------|
|                    | Statistic | Std. Error |
| TrhT0              | ,006      | ,362       |
| TbuT0              | ,752      | ,362       |
| LrhT0              | -,526     | ,386       |
| LbuT0              | ,579      | ,386       |
| TrhT2              | 1,008     | ,362       |
| TbuT2              | 2,409     | ,362       |
| LrhT2              | 4,896     | ,386       |
| LbuT2              | 2,066     | ,386       |
| Valid N (listwise) |           |            |

```
T-TEST GROUPS=VAR00002(1 2)
/MISSING=ANALYSIS
/VARIABLES=VAR00006 VAR00007 VAR00010 VAR00011 VAR00012 VAR00013 VAR00014 VAR00015
/CRITERIA=CI(.95).
```

## T-Test

### Notes

|                        |                                   |                                                                                                                                                                             |
|------------------------|-----------------------------------|-----------------------------------------------------------------------------------------------------------------------------------------------------------------------------|
| Output Created         |                                   | 12-JUL-2015 11:24:18                                                                                                                                                        |
| Comments               |                                   |                                                                                                                                                                             |
| Input                  | Data                              | D:\SOSORT\2015<br>Katowice\SOSORT<br>AWARD\6 months clinical.<br>sav                                                                                                        |
|                        | Active Dataset                    | Ensemble_de_données0                                                                                                                                                        |
|                        | Filter                            | <none>                                                                                                                                                                      |
|                        | Weight                            | <none>                                                                                                                                                                      |
|                        | Split File                        | <none>                                                                                                                                                                      |
|                        | N of Rows in Working<br>Data File | 242                                                                                                                                                                         |
| Missing Value Handling | Definition of Missing             | User defined missing<br>values are treated as<br>missing.                                                                                                                   |
|                        | Cases Used                        | Statistics for each analysis<br>are based on the cases<br>with no missing or out-of-<br>range data for any variable<br>in the analysis.                                     |
| Syntax                 |                                   | T-TEST<br>GROUPS=VAR00002(1 2)<br>/MISSING=ANALYSIS<br>/VARIABLES=VAR00006<br>VAR00007 VAR00010<br>VAR00011 VAR00012<br>VAR00013 VAR00014<br>VAR00015<br>/CRITERIA=CI(.95). |
| Resources              | Processor Time                    | 00:00:00,02                                                                                                                                                                 |
|                        | Elapsed Time                      | 00:00:00,01                                                                                                                                                                 |

[Ensemble\_de\_données0] D:\SOSORT\2015 Katowice\SOSORT AWARD\6 months clinical.sav

**Group Statistics**

| Group   | N   | Mean  | Std. Deviation | Std. Error Mean |
|---------|-----|-------|----------------|-----------------|
| TrhT0 1 | 77  | 23,56 | 8,608          | ,981            |
| TrhT0 2 | 101 | 23,44 | 9,432          | ,939            |
| TbuT0 1 | 77  | 10,55 | 3,858          | ,440            |
| TbuT0 2 | 101 | 9,75  | 4,122          | ,410            |
| LrhT0 1 | 51  | 16,41 | 7,365          | 1,031           |
| LrhT0 2 | 105 | 17,21 | 7,764          | ,758            |
| LbuT0 1 | 51  | 7,47  | 3,378          | ,473            |
| LbuT0 2 | 105 | 7,51  | 3,630          | ,354            |
| TrhT2 1 | 77  | 16,70 | 8,464          | ,965            |
| TrhT2 2 | 101 | 10,33 | 6,588          | ,656            |
| TbuT2 1 | 77  | 7,95  | 4,049          | ,461            |
| TbuT2 2 | 101 | 5,14  | 3,293          | ,328            |
| LrhT2 1 | 51  | 9,41  | 6,258          | ,876            |
| LrhT2 2 | 105 | 4,65  | 4,459          | ,435            |
| LbuT2 1 | 51  | 4,51  | 3,215          | ,450            |
| LbuT2 2 | 105 | 2,06  | 2,429          | ,237            |

**Independent Samples Test**

|       |                             | Levene's Test for Equality of Variances |      | t-test for Equality of Means |         |
|-------|-----------------------------|-----------------------------------------|------|------------------------------|---------|
|       |                             | F                                       | Sig. | t                            | df      |
| TrhT0 | Equal variances assumed     | 1,025                                   | ,313 | ,089                         | 176     |
|       | Equal variances not assumed |                                         |      | ,090                         | 170,345 |
| TbuT0 | Equal variances assumed     | ,338                                    | ,562 | 1,307                        | 176     |
|       | Equal variances not assumed |                                         |      | 1,319                        | 168,722 |
| LrhT0 | Equal variances assumed     | ,848                                    | ,358 | -,612                        | 154     |
|       | Equal variances not assumed |                                         |      | -,623                        | 103,979 |
| LbuT0 | Equal variances assumed     | ,223                                    | ,637 | -,072                        | 154     |
|       | Equal variances not assumed |                                         |      | -,074                        | 105,795 |
| TrhT2 | Equal variances assumed     | 3,154                                   | ,077 | 5,651                        | 176     |
|       | Equal variances not assumed |                                         |      | 5,466                        | 139,764 |

**Independent Samples Test**

|       |                             | t-test for Equality of Means |                 |                       |                    |
|-------|-----------------------------|------------------------------|-----------------|-----------------------|--------------------|
|       |                             | Sig. (2-tailed)              | Mean Difference | Std. Error Difference | 95% Confidence ... |
|       |                             |                              |                 |                       | Lower              |
| TrhT0 | Equal variances assumed     | ,929                         | ,123            | 1,375                 | -2,590             |
|       | Equal variances not assumed | ,928                         | ,123            | 1,358                 | -2,557             |
| TbuT0 | Equal variances assumed     | ,193                         | ,793            | ,607                  | -,404              |
|       | Equal variances not assumed | ,189                         | ,793            | ,601                  | -,394              |
| LrhT0 | Equal variances assumed     | ,541                         | -,798           | 1,303                 | -3,373             |
|       | Equal variances not assumed | ,534                         | -,798           | 1,280                 | -3,336             |
| LbuT0 | Equal variances assumed     | ,943                         | -,044           | ,606                  | -1,241             |
|       | Equal variances not assumed | ,941                         | -,044           | ,591                  | -1,215             |
| TrhT2 | Equal variances assumed     | ,000                         | 6,375           | 1,128                 | 4,148              |
|       | Equal variances not assumed | ,000                         | 6,375           | 1,166                 | 4,069              |

**Independent Samples Test**

|       |                             | t-test for Equality of ... |
|-------|-----------------------------|----------------------------|
|       |                             | 95% Confidence ...         |
|       |                             | Upper                      |
| TrhT0 | Equal variances assumed     | 2,835                      |
|       | Equal variances not assumed | 2,803                      |
| TbuT0 | Equal variances assumed     | 1,990                      |
|       | Equal variances not assumed | 1,980                      |
| LrhT0 | Equal variances assumed     | 1,777                      |
|       | Equal variances not assumed | 1,740                      |
| LbuT0 | Equal variances assumed     | 1,153                      |
|       | Equal variances not assumed | 1,128                      |
| TrhT2 | Equal variances assumed     | 8,601                      |
|       | Equal variances not assumed | 8,680                      |

**Independent Samples Test**

|       |                             | Levene's Test for Equality of Variances |      | t-test for Equality of Means |         |
|-------|-----------------------------|-----------------------------------------|------|------------------------------|---------|
|       |                             | F                                       | Sig. | t                            | df      |
| TbuT2 | Equal variances assumed     | ,573                                    | ,450 | 5,104                        | 176     |
|       | Equal variances not assumed |                                         |      | 4,965                        | 144,114 |
| LrhT2 | Equal variances assumed     | 4,211                                   | ,042 | 5,459                        | 154     |
|       | Equal variances not assumed |                                         |      | 4,869                        | 75,492  |
| LbuT2 | Equal variances assumed     | 6,595                                   | ,011 | 5,304                        | 154     |
|       | Equal variances not assumed |                                         |      | 4,821                        | 78,668  |

**Independent Samples Test**

|       |                             | t-test for Equality of Means |                 |                       |                    |
|-------|-----------------------------|------------------------------|-----------------|-----------------------|--------------------|
|       |                             | Sig. (2-tailed)              | Mean Difference | Std. Error Difference | 95% Confidence ... |
|       |                             |                              |                 |                       | Lower              |
| TbuT2 | Equal variances assumed     | ,000                         | 2,809           | ,550                  | 1,723              |
|       | Equal variances not assumed | ,000                         | 2,809           | ,566                  | 1,691              |
| LrhT2 | Equal variances assumed     | ,000                         | 4,764           | ,873                  | 3,040              |
|       | Equal variances not assumed | ,000                         | 4,764           | ,978                  | 2,815              |
| LbuT2 | Equal variances assumed     | ,000                         | 2,453           | ,462                  | 1,539              |
|       | Equal variances not assumed | ,000                         | 2,453           | ,509                  | 1,440              |

**Independent Samples Test**

|       |                             | t-test for Equality of ... |
|-------|-----------------------------|----------------------------|
|       |                             | 95% Confidence ...         |
|       |                             | Upper                      |
| TbuT2 | Equal variances assumed     | 3,896                      |
|       | Equal variances not assumed | 3,928                      |
| LrhT2 | Equal variances assumed     | 6,488                      |
|       | Equal variances not assumed | 6,713                      |
| LbuT2 | Equal variances assumed     | 3,366                      |
|       | Equal variances not assumed | 3,465                      |

```

T-TEST GROUPS=VAR00021(1 2)
/MISSING=ANALYSIS
/VARIABLES=VAR00005 VAR00008 VAR00009 VAR00010 VAR00013 VAR00014 VAR0001
7 VAR00018
/CRITERIA=CI(.95).

```

## T-Test

[Ensemble\_de\_données1] D:\Bibliothèques\Documents\ARTbrace matched pair co  
ntrol.sav

**Group Statistics**

|            | Categorie | N   | Mean    | Std. Deviation | Std. Error<br>Mean |
|------------|-----------|-----|---------|----------------|--------------------|
| T init     | 1,00      | 76  | 31,1447 | 9,62179        | 1,10369            |
|            | 2,00      | 108 | 30,0370 | 8,30148        | ,79881             |
| L init     | 1,00      | 59  | 26,6949 | 7,72201        | 1,00532            |
|            | 2,00      | 87  | 27,8276 | 7,50536        | ,80466             |
| T in-brace | 1,00      | 76  | 16,9605 | 9,35442        | 1,07303            |
|            | 2,00      | 108 | 11,2593 | 8,65796        | ,83311             |
| Lin-brace  | 1,00      | 59  | 12,3220 | 7,93604        | 1,03318            |
|            | 2,00      | 87  | 6,6437  | 8,74972        | ,93807             |
| T 6 months | 1,00      | 76  | 23,9605 | 10,95012       | 1,25606            |
|            | 2,00      | 108 | 20,2500 | 10,77651       | 1,03697            |
| L 6 months | 1,00      | 59  | 18,8136 | 9,38722        | 1,22211            |
|            | 2,00      | 87  | 15,5057 | 9,07575        | ,97302             |
| T 1 year   | 1,00      | 76  | 26,9474 | 11,89386       | 1,36432            |
|            | 2,00      | 108 | 21,4722 | 11,05505       | 1,06377            |
| L 1 year   | 1,00      | 59  | 20,4068 | 10,01915       | 1,30438            |
|            | 2,00      | 87  | 16,4023 | 9,37644        | 1,00526            |



**Independent Samples Test**

|            |                             | Levene's Test for Equality of Variances |      | t-test for Equality of Means |         |
|------------|-----------------------------|-----------------------------------------|------|------------------------------|---------|
|            |                             | F                                       | Sig. | t                            | df      |
| T init     | Equal variances assumed     | 1,416                                   | ,236 | ,834                         | 182     |
|            | Equal variances not assumed |                                         |      | ,813                         | 146,061 |
| L init     | Equal variances assumed     | ,049                                    | ,826 | -,884                        | 144     |
|            | Equal variances not assumed |                                         |      | -,880                        | 122,274 |
| T in-brace | Equal variances assumed     | ,039                                    | ,843 | 4,254                        | 182     |
|            | Equal variances not assumed |                                         |      | 4,197                        | 153,563 |
| Lin-brace  | Equal variances assumed     | ,139                                    | ,710 | 3,993                        | 144     |
|            | Equal variances not assumed |                                         |      | 4,069                        | 132,372 |
| T 6 months | Equal variances assumed     | ,034                                    | ,854 | 2,284                        | 182     |
|            | Equal variances not assumed |                                         |      | 2,278                        | 159,983 |
| L 6 months | Equal variances assumed     | ,019                                    | ,891 | 2,131                        | 144     |
|            | Equal variances not assumed |                                         |      | 2,117                        | 121,824 |
| T 1 year   | Equal variances assumed     | ,110                                    | ,741 | 3,205                        | 182     |
|            | Equal variances not assumed |                                         |      | 3,165                        | 154,013 |
| L 1 year   | Equal variances assumed     | ,000                                    | ,986 | 2,463                        | 144     |
|            | Equal variances not assumed |                                         |      | 2,432                        | 119,038 |

**Independent Samples Test**

|            |                             | t-test for Equality of Means |                 |                       |
|------------|-----------------------------|------------------------------|-----------------|-----------------------|
|            |                             | Sig. (2-tailed)              | Mean Difference | Std. Error Difference |
| T init     | Equal variances assumed     | ,405                         | 1,10770         | 1,32796               |
|            | Equal variances not assumed | ,418                         | 1,10770         | 1,36244               |
| L init     | Equal variances assumed     | ,378                         | -1,13267        | 1,28063               |
|            | Equal variances not assumed | ,381                         | -1,13267        | 1,28769               |
| T in-brace | Equal variances assumed     | ,000                         | 5,70127         | 1,34025               |
|            | Equal variances not assumed | ,000                         | 5,70127         | 1,35848               |
| Lin-brace  | Equal variances assumed     | ,000                         | 5,67836         | 1,42198               |
|            | Equal variances not assumed | ,000                         | 5,67836         | 1,39551               |
| T 6 months | Equal variances assumed     | ,023                         | 3,71053         | 1,62426               |
|            | Equal variances not assumed | ,024                         | 3,71053         | 1,62880               |
| L 6 months | Equal variances assumed     | ,035                         | 3,30781         | 1,55201               |
|            | Equal variances not assumed | ,036                         | 3,30781         | 1,56215               |
| T 1 year   | Equal variances assumed     | ,002                         | 5,47515         | 1,70807               |
|            | Equal variances not assumed | ,002                         | 5,47515         | 1,73002               |
| L 1 year   | Equal variances assumed     | ,015                         | 4,00448         | 1,62588               |
|            | Equal variances not assumed | ,017                         | 4,00448         | 1,64680               |

**Independent Samples Test**

|            |                             | t-test for Equality of Means              |         |
|------------|-----------------------------|-------------------------------------------|---------|
|            |                             | 95% Confidence Interval of the Difference |         |
|            |                             | Lower                                     | Upper   |
| T init     | Equal variances assumed     | -1,51247                                  | 3,72787 |
|            | Equal variances not assumed | -1,58494                                  | 3,80034 |
| L init     | Equal variances assumed     | -3,66394                                  | 1,39860 |
|            | Equal variances not assumed | -3,68172                                  | 1,41638 |
| T in-brace | Equal variances assumed     | 3,05683                                   | 8,34570 |
|            | Equal variances not assumed | 3,01755                                   | 8,38498 |
| Lin-brace  | Equal variances assumed     | 2,86771                                   | 8,48900 |
|            | Equal variances not assumed | 2,91798                                   | 8,43874 |
| T 6 months | Equal variances assumed     | ,50573                                    | 6,91533 |
|            | Equal variances not assumed | ,49379                                    | 6,92726 |
| L 6 months | Equal variances assumed     | ,24014                                    | 6,37548 |
|            | Equal variances not assumed | ,21533                                    | 6,40030 |
| T 1 year   | Equal variances assumed     | 2,10497                                   | 8,84532 |
|            | Equal variances not assumed | 2,05751                                   | 8,89278 |
| L 1 year   | Equal variances assumed     | ,79080                                    | 7,21816 |
|            | Equal variances not assumed | ,74366                                    | 7,26531 |
